# Supplementary material for: Polyphenol Diversity and Antioxidant Activity of European Cistus creticus L. (Cistaceae) Compared to Six Further, Partly Sympatric Cistus Species
Source: MDPI journal article supplement (doi:10.3390/plants10040615), 2021-03-24

# Picture Gallery

Pictures provided from Brigitte Lukas, Johannes Novak, Corinna Schmiderer

*C. albidus*, wild populations in Portugal

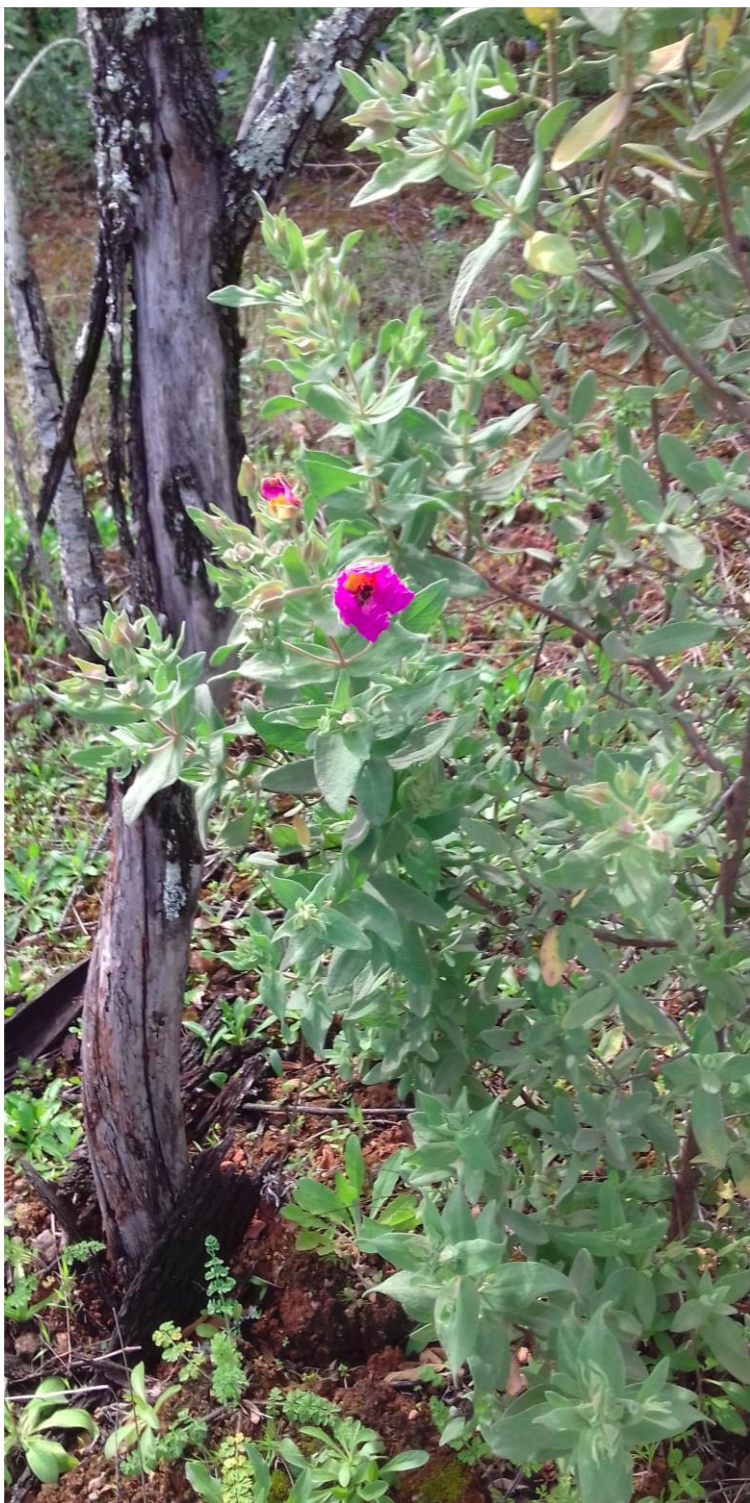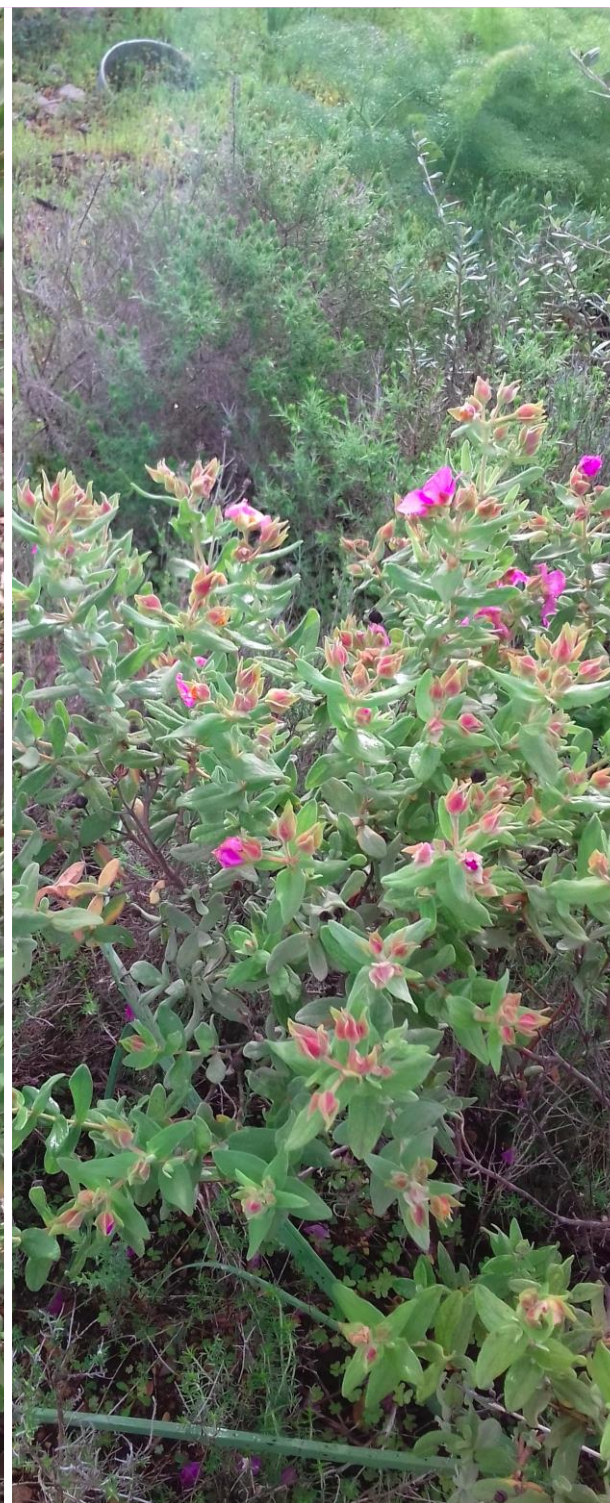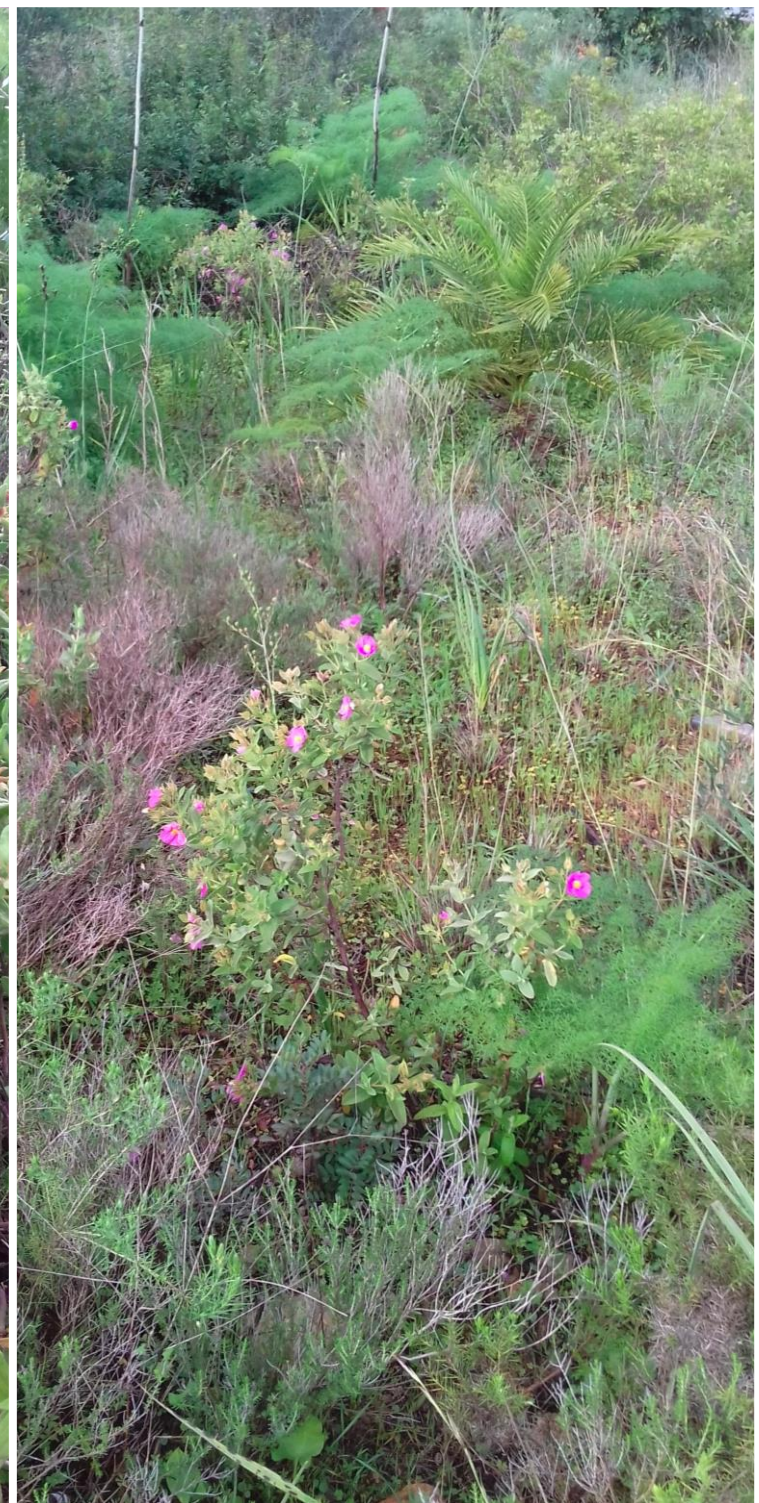

SC7, *C. albidus*, Spain

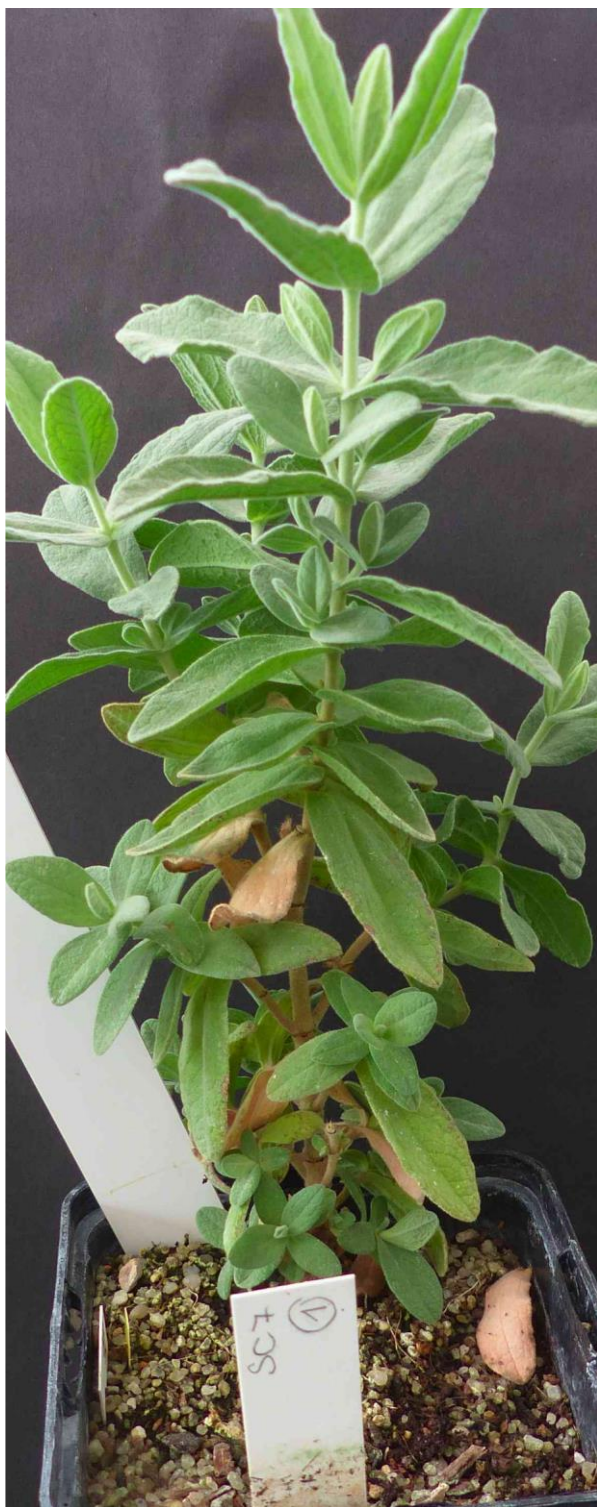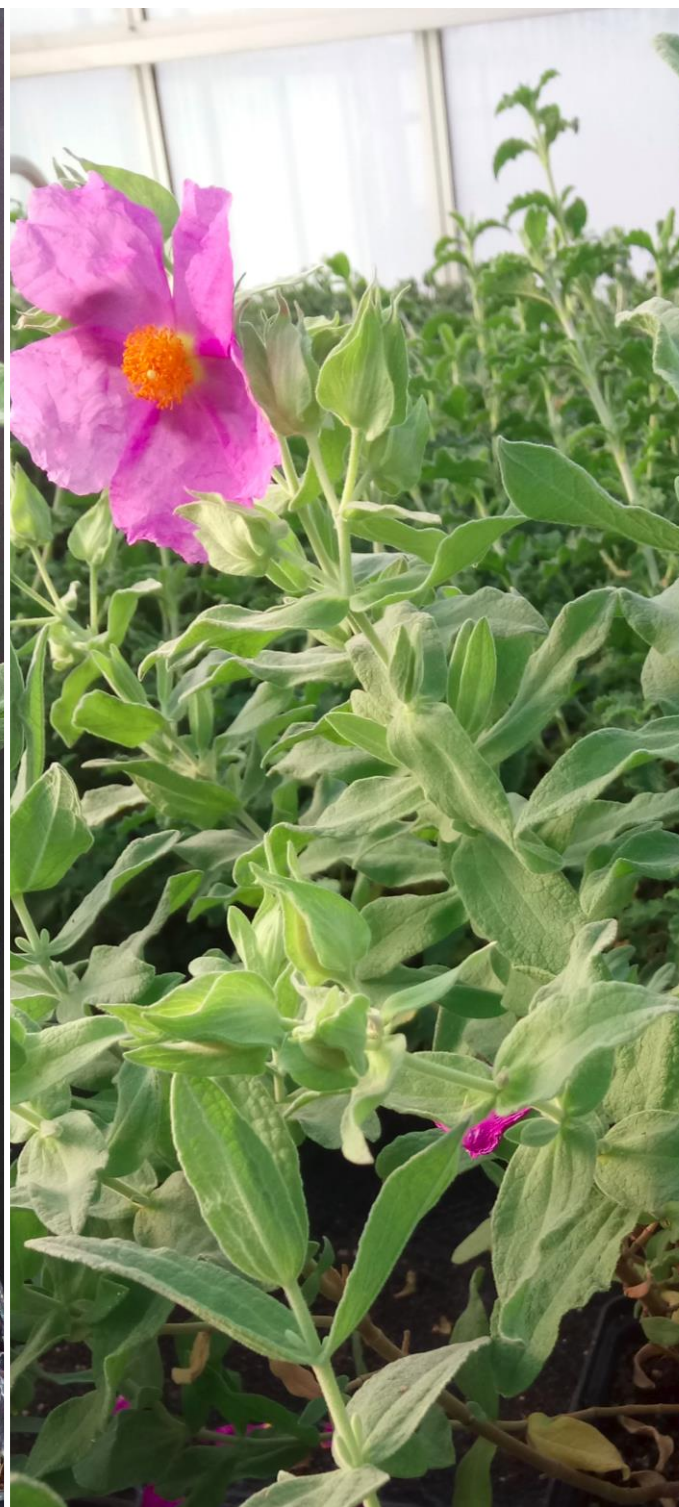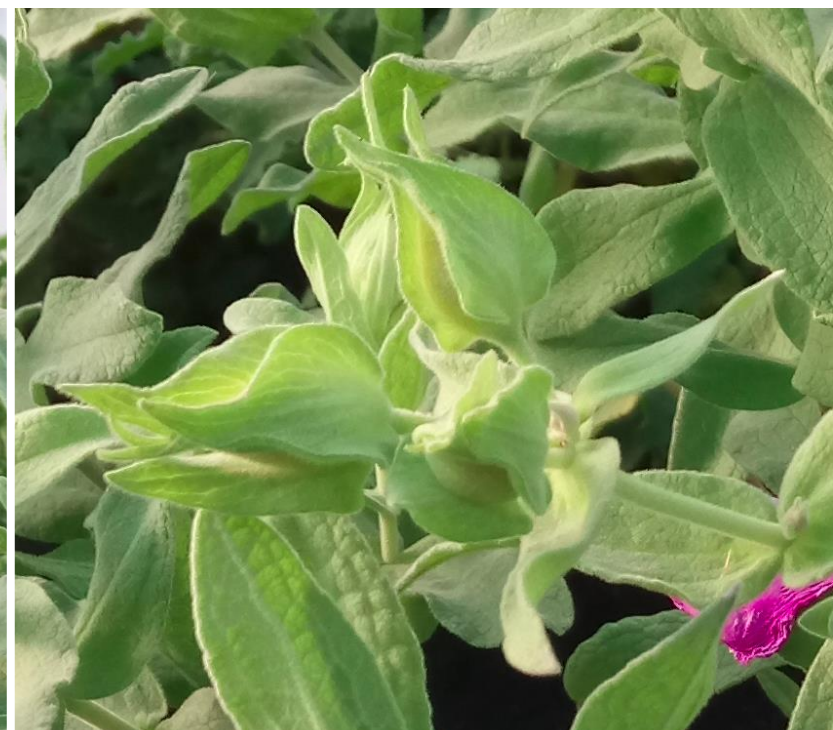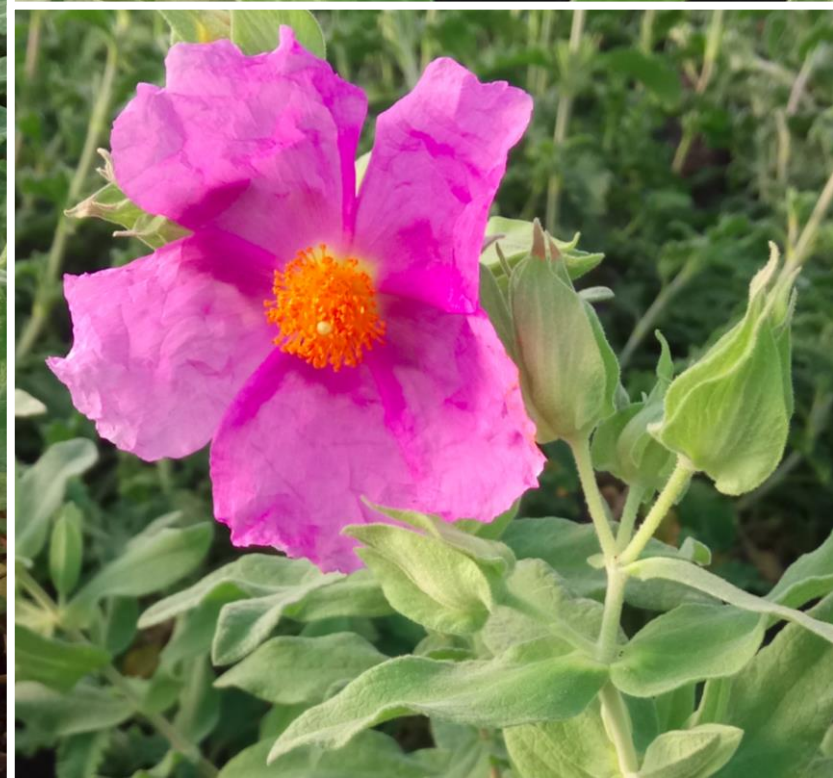

SC10, *C. albidus*, Spain

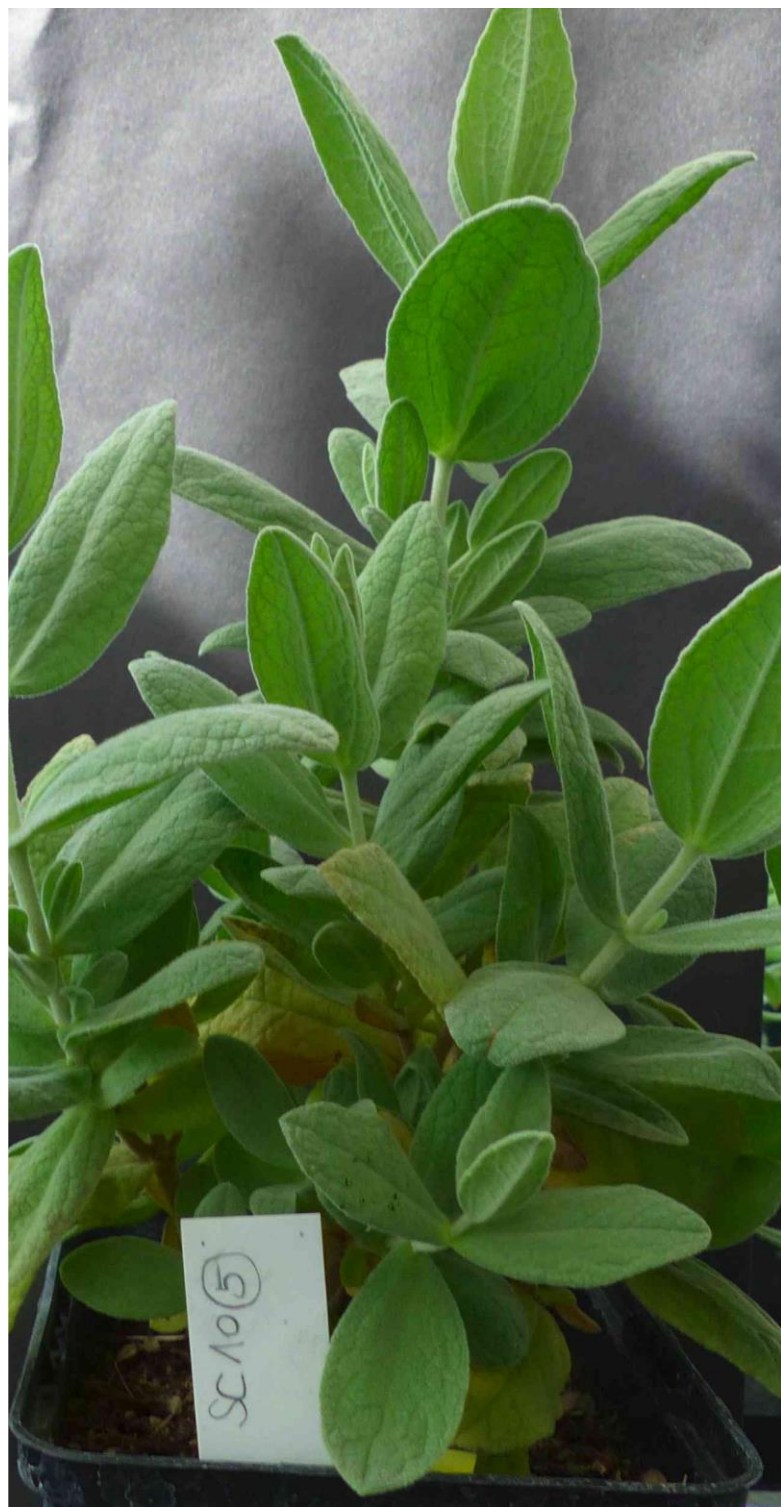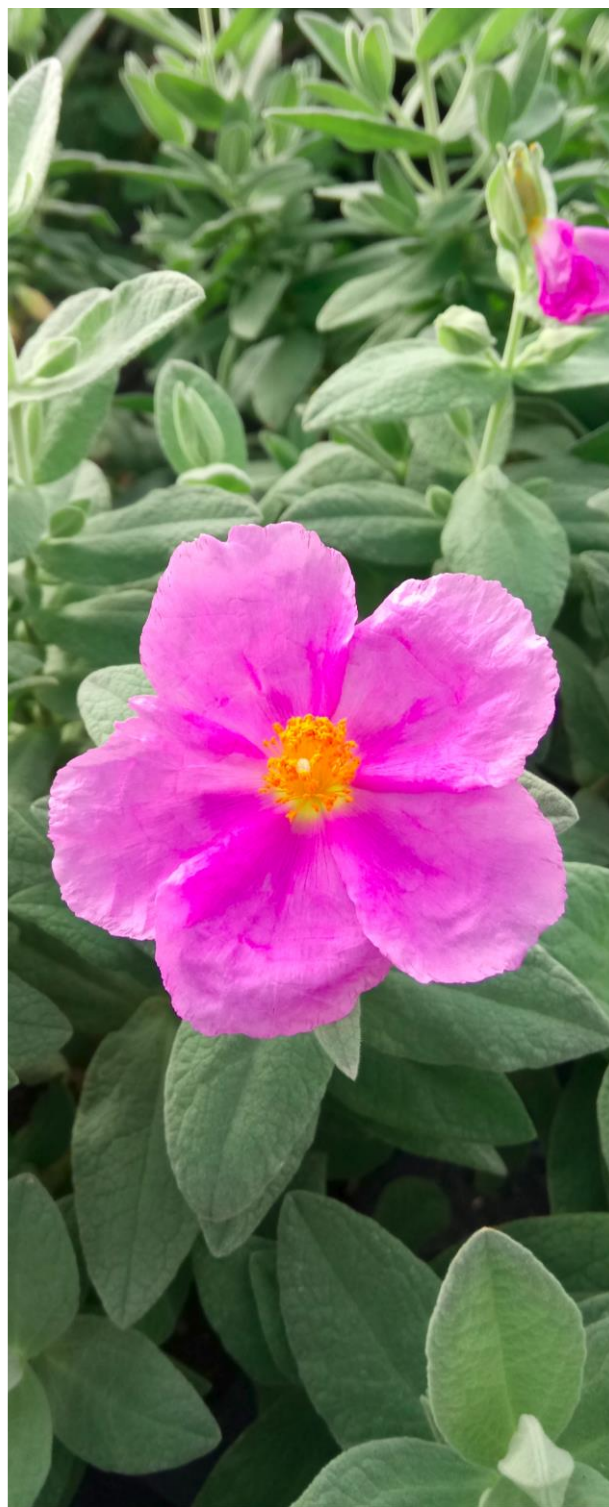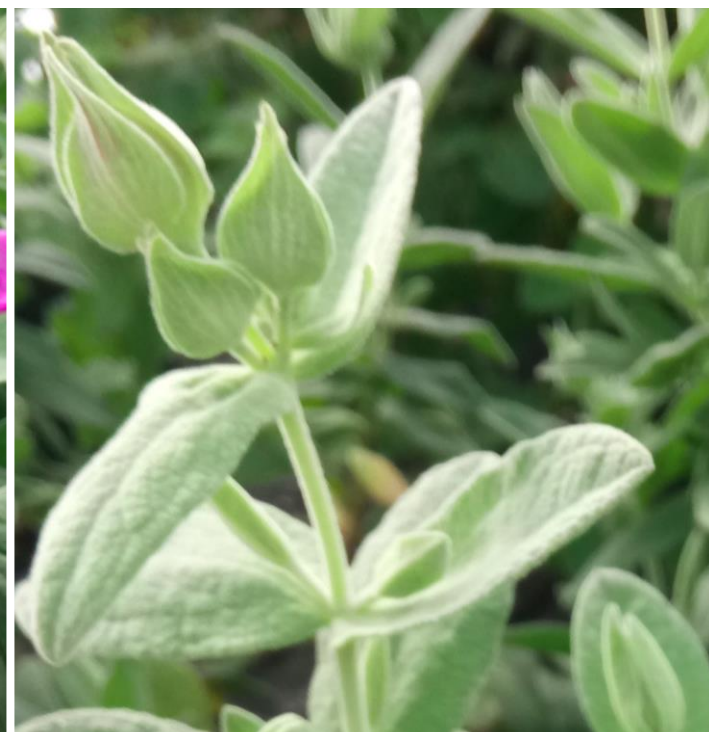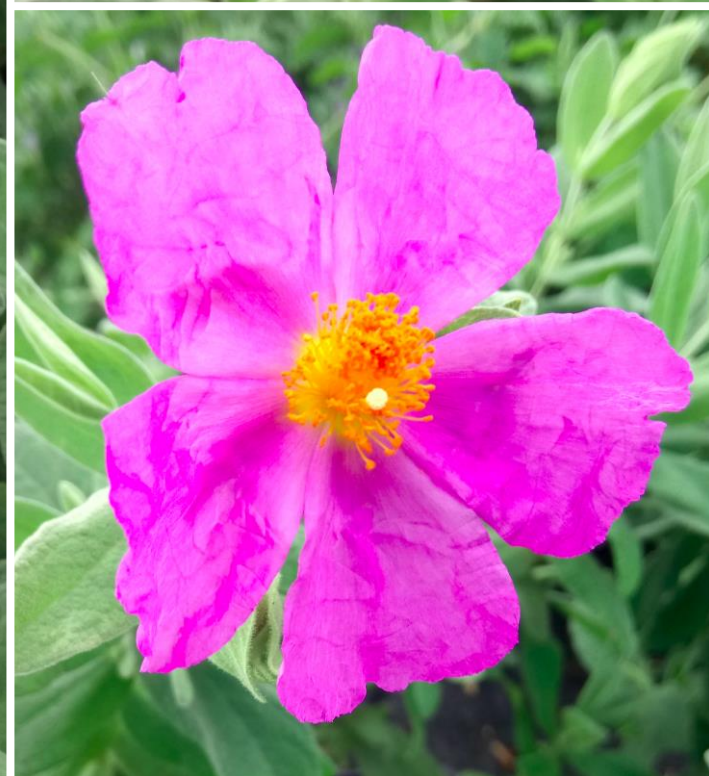

*C. creticus*, wild populations in Italy

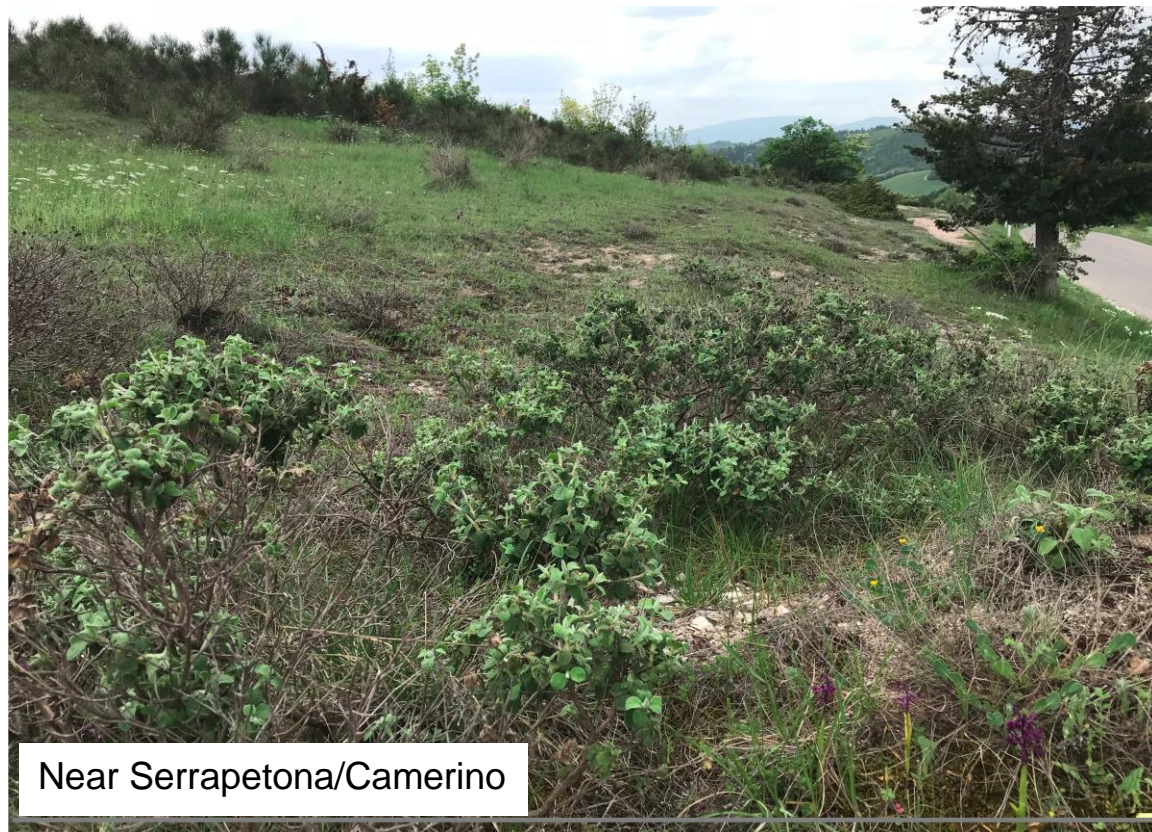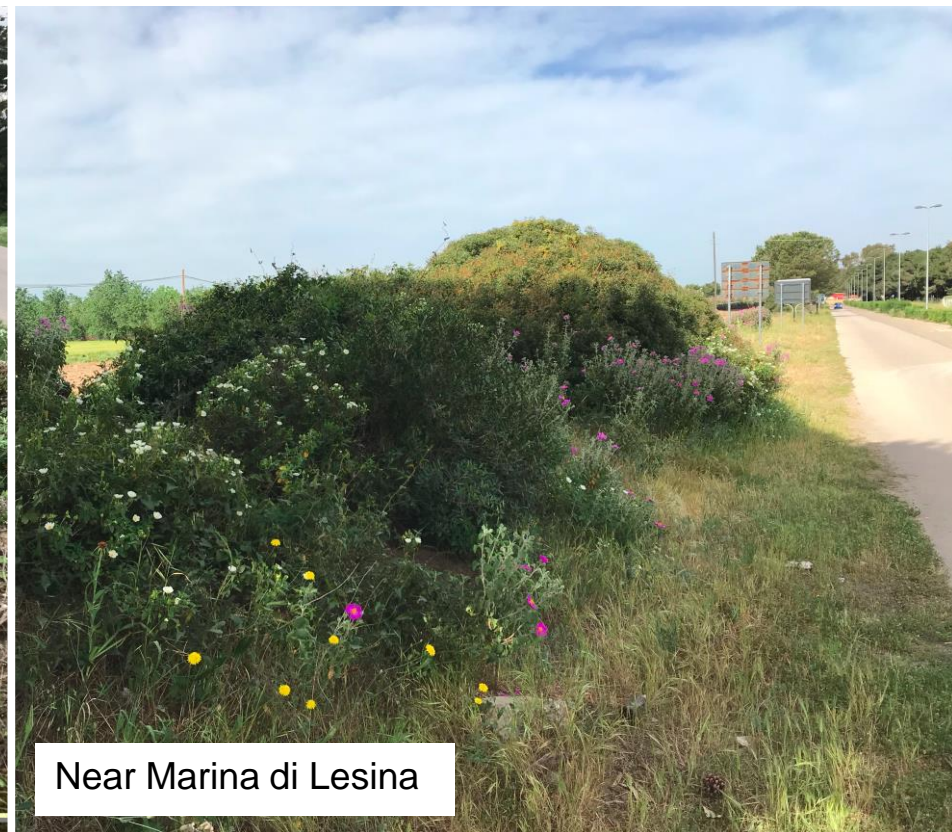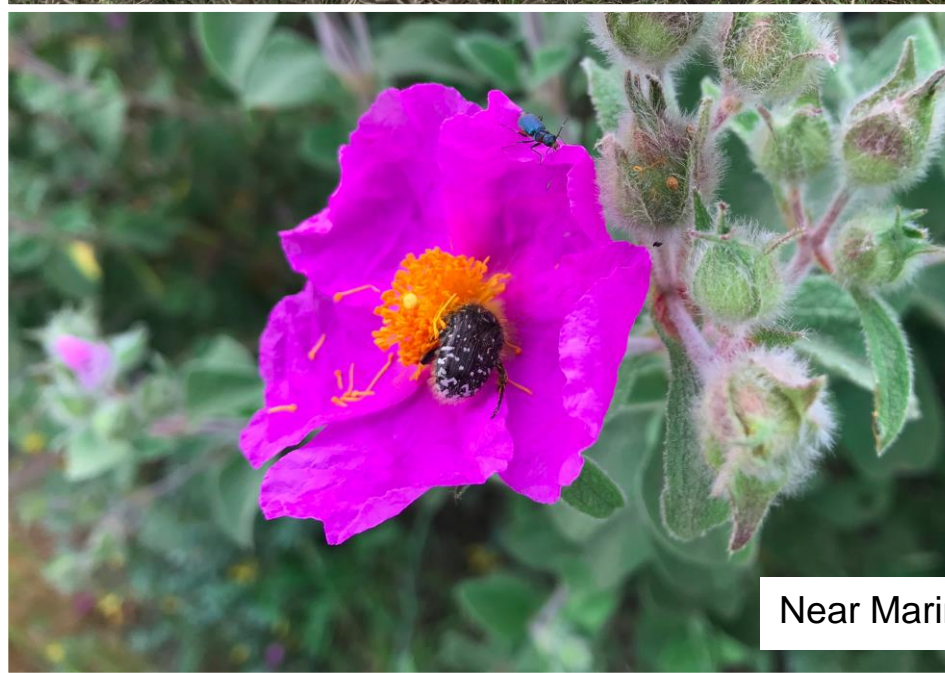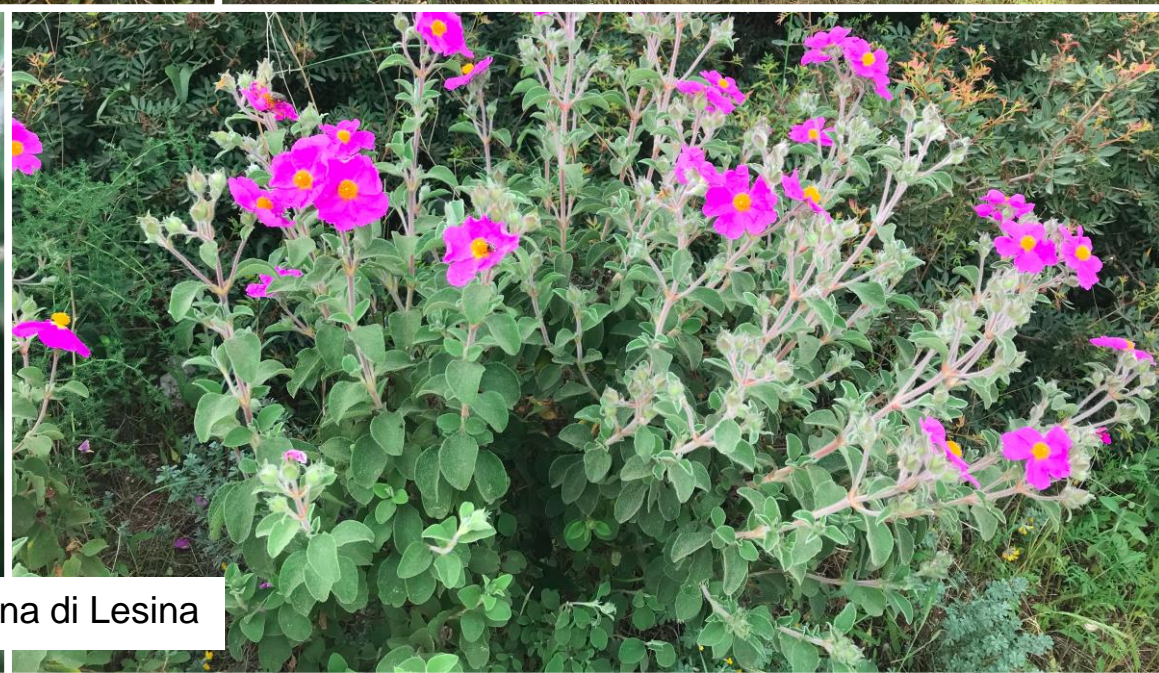

*C. creticus*, wild populations in Italy

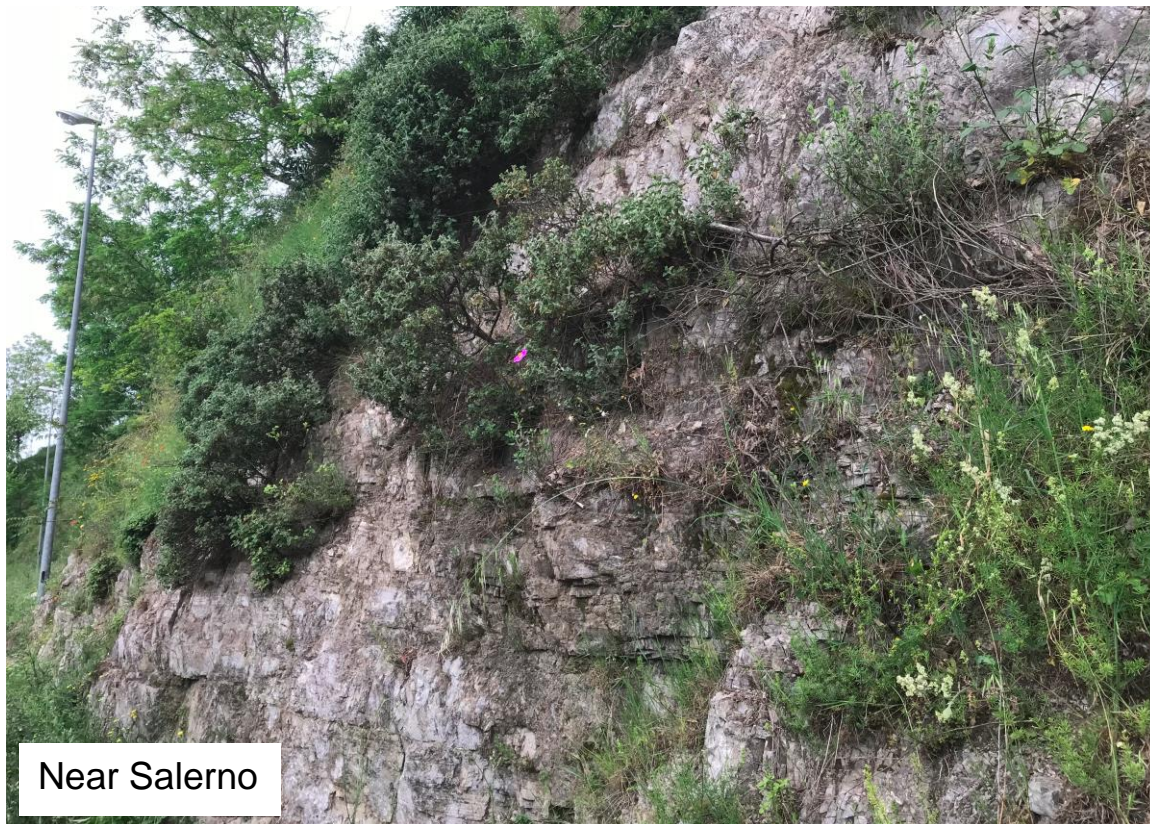

Near Salerno

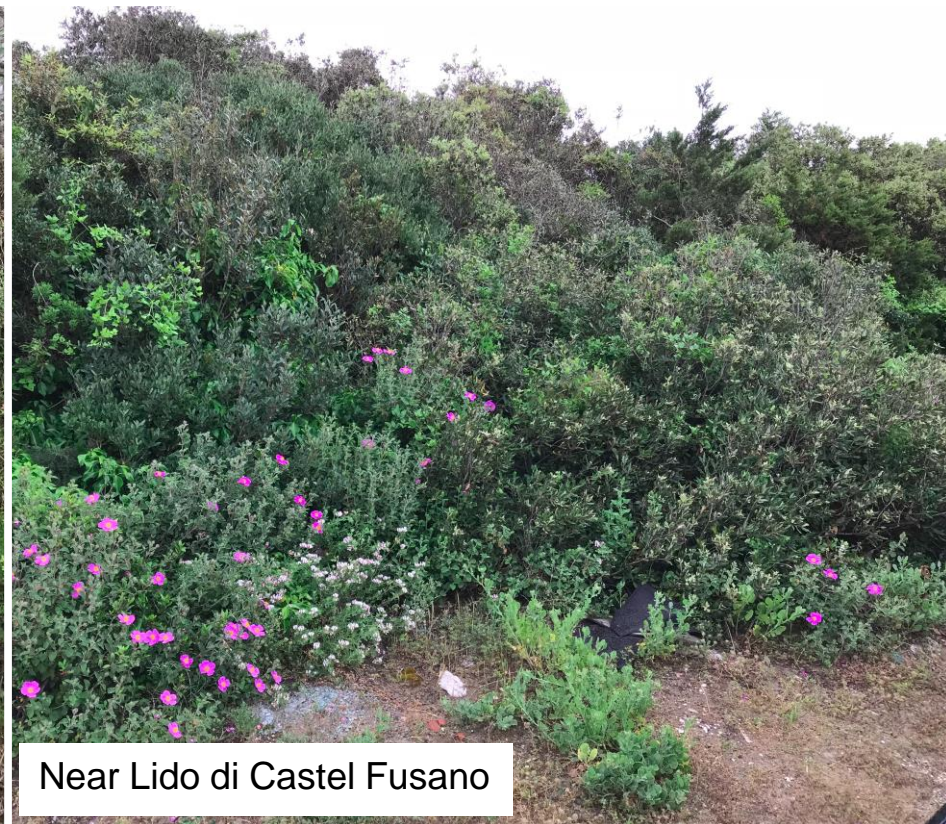

Near Lido di Castel Fusano

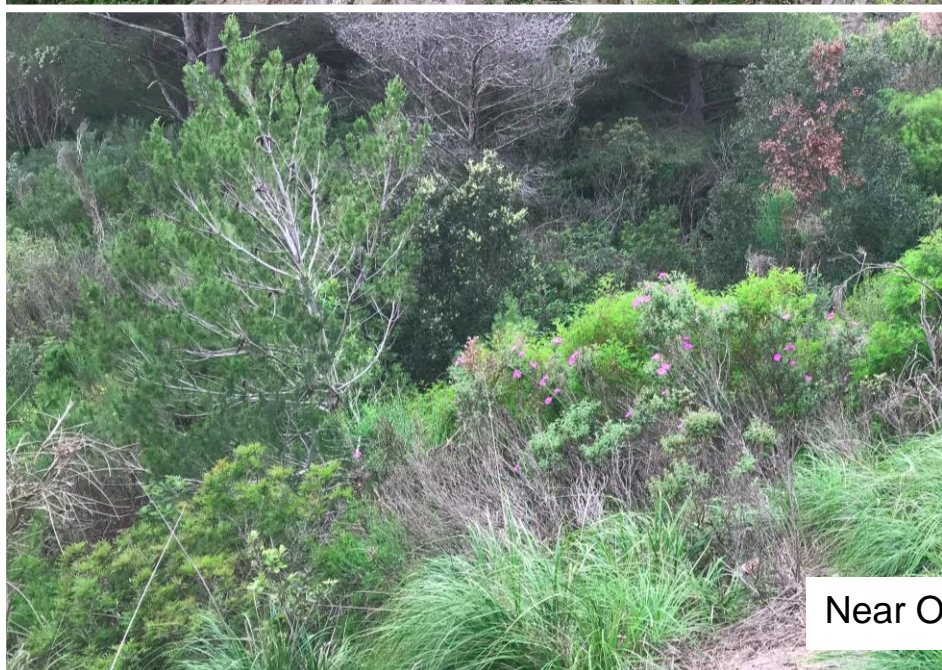

Near Orbetello

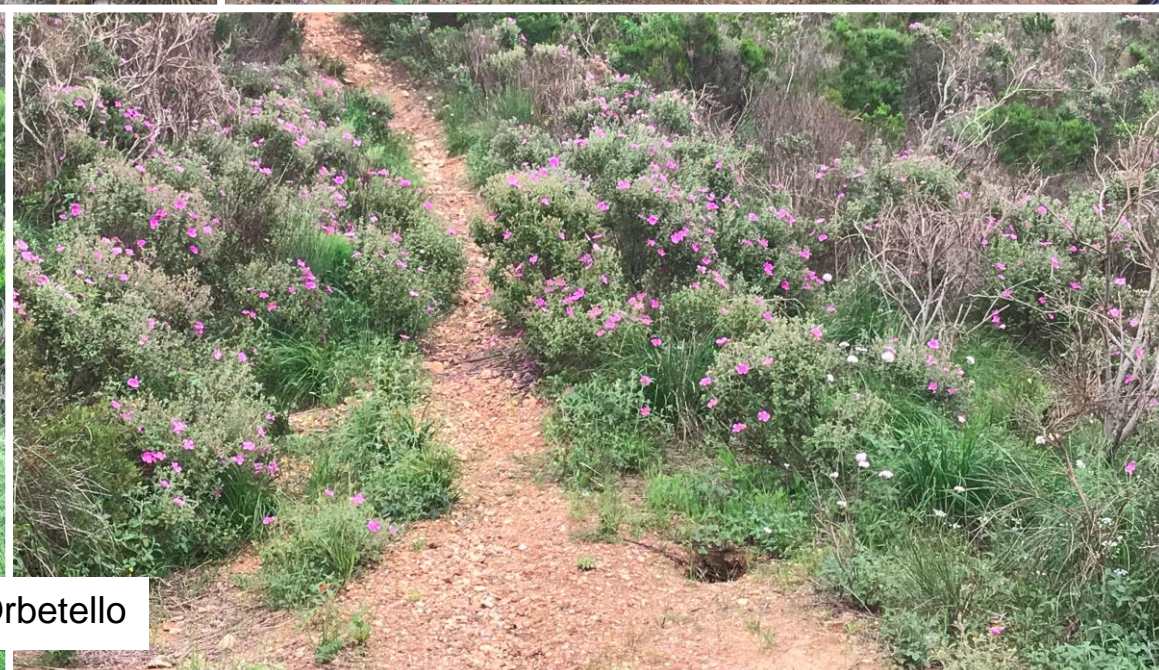

CR1, *C. creticus*, Croatia

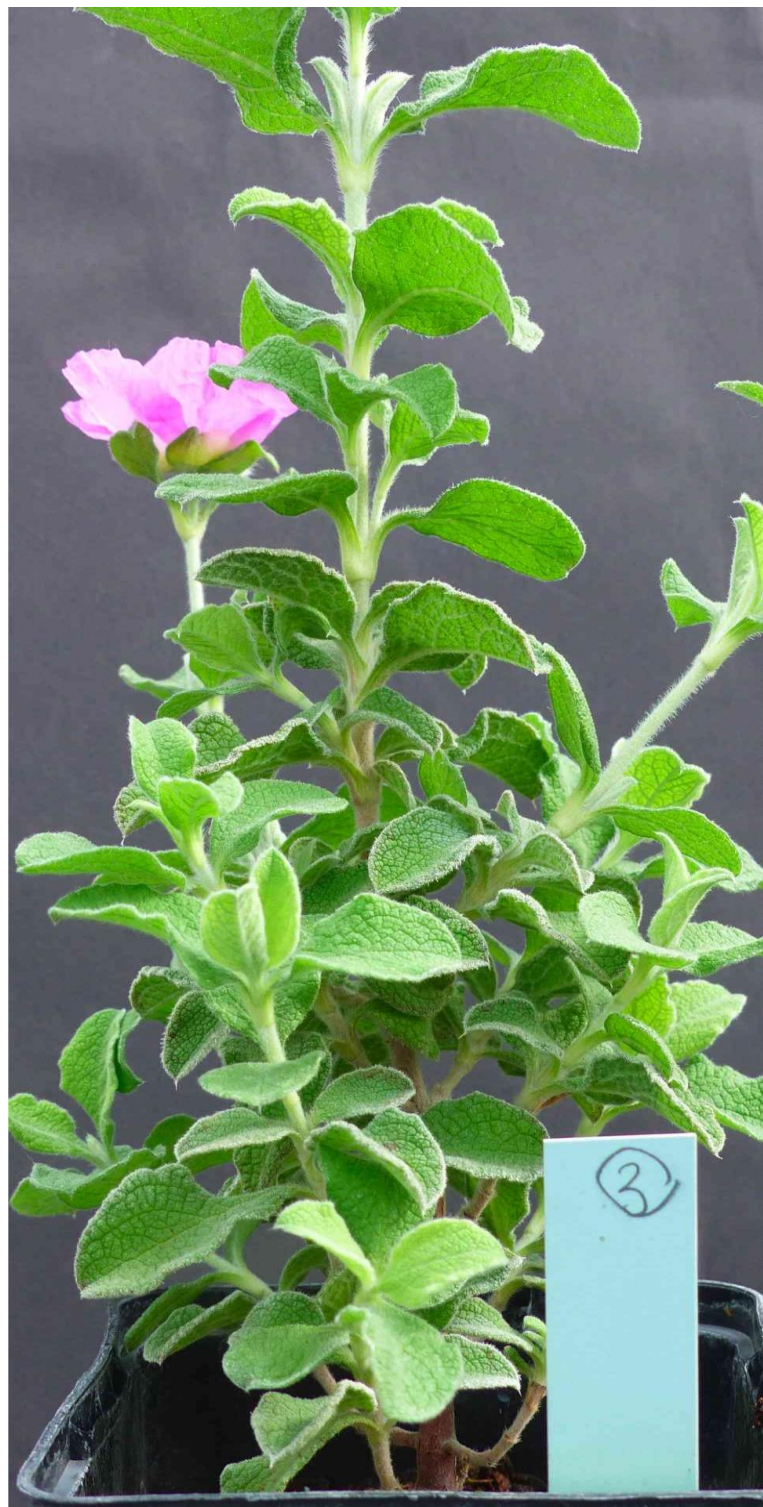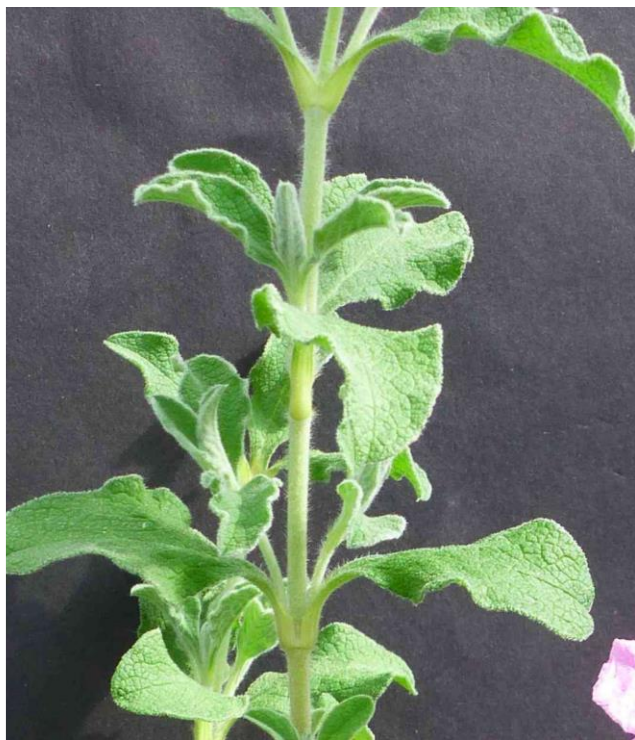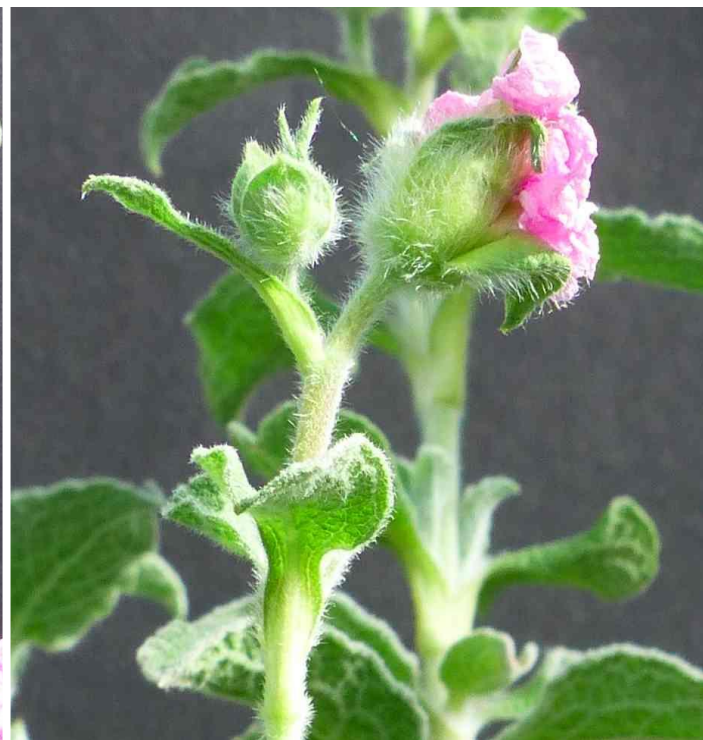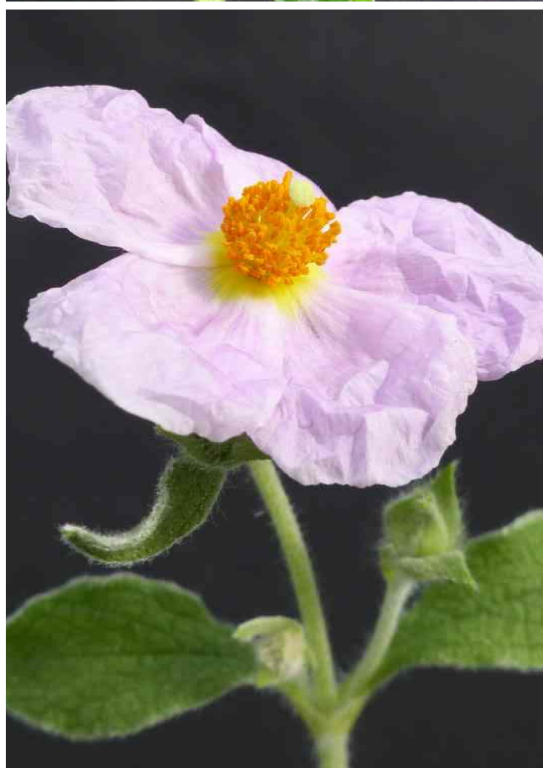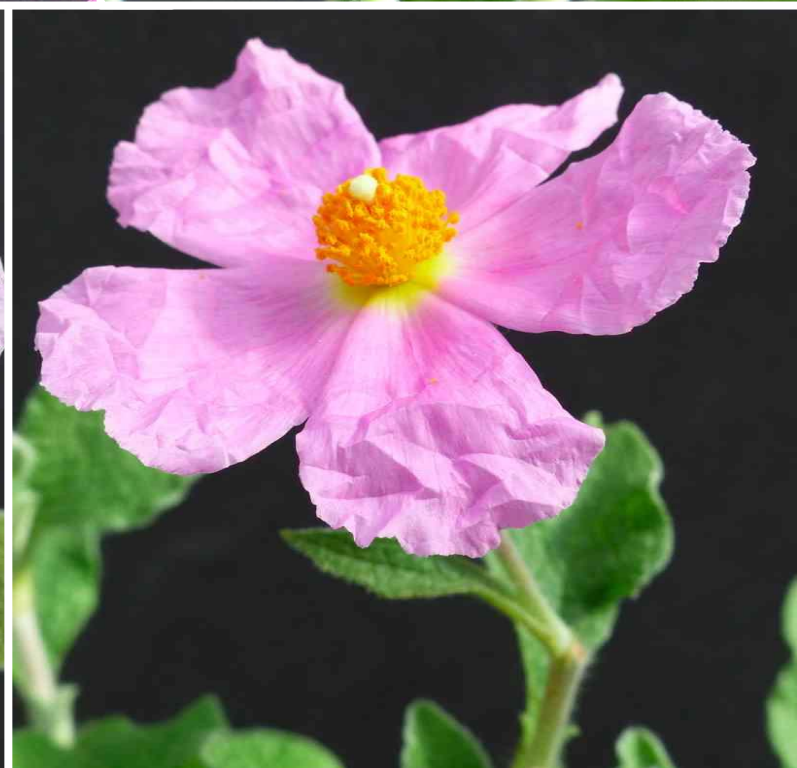

*C. creticus*, wild populations in Croatia

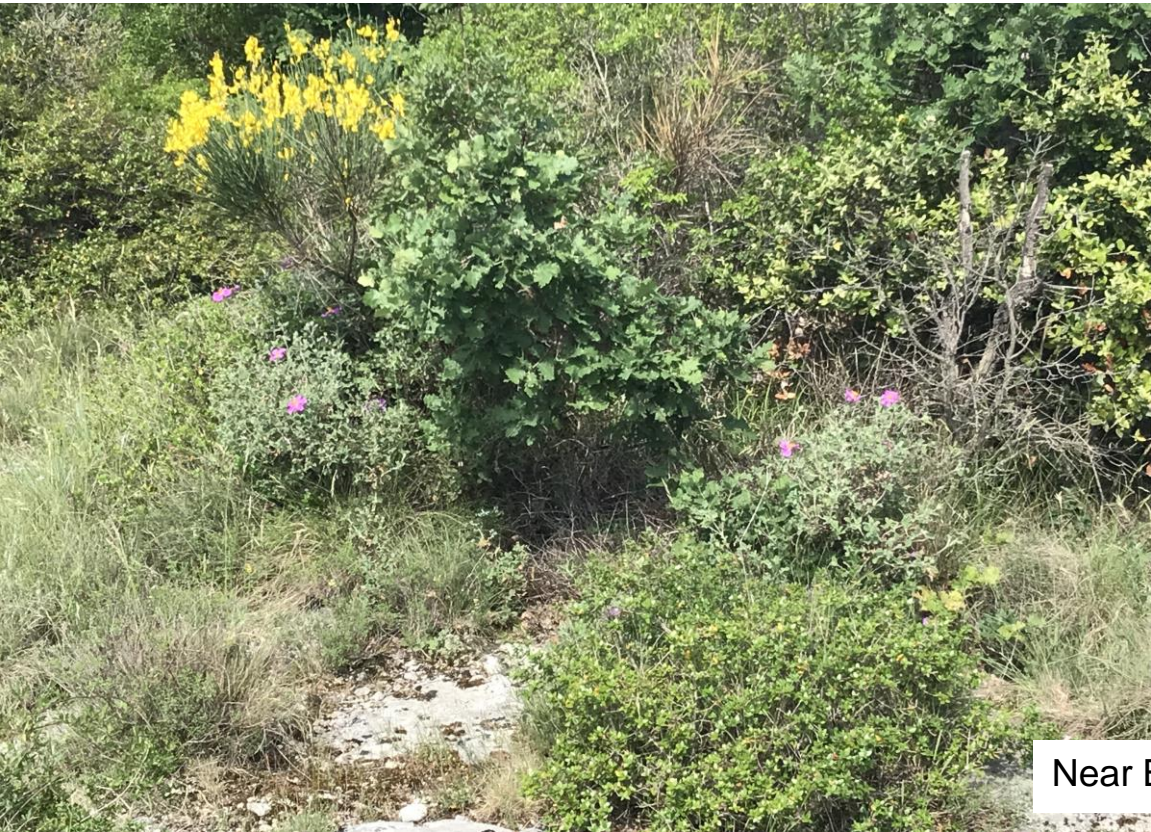

Near Bale

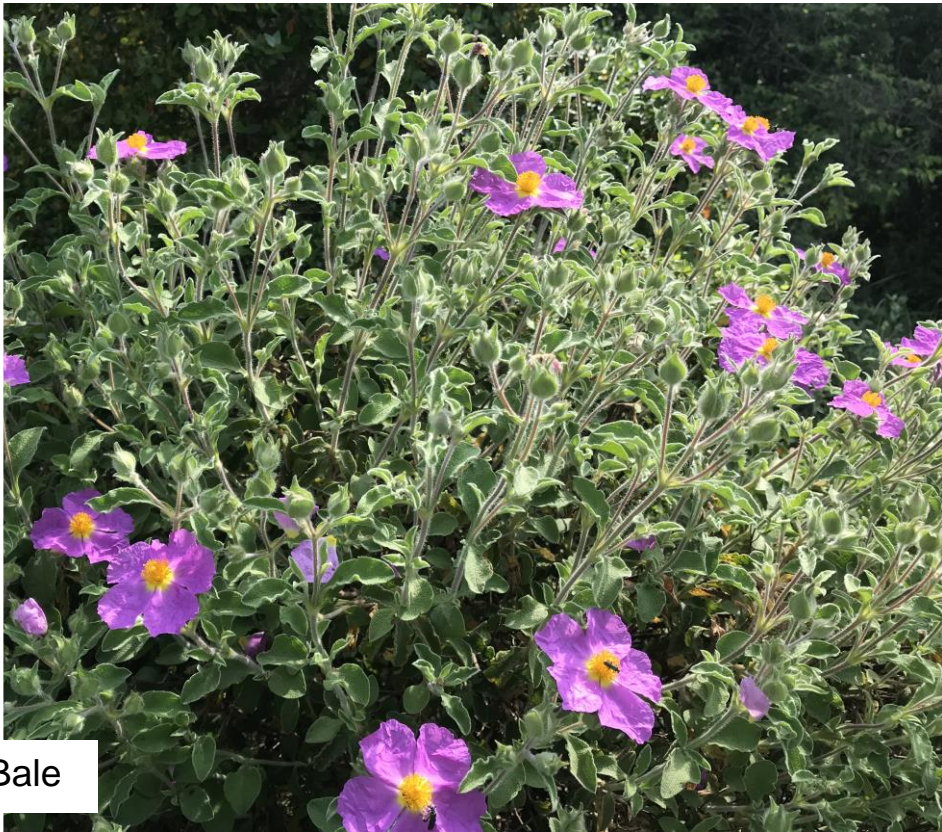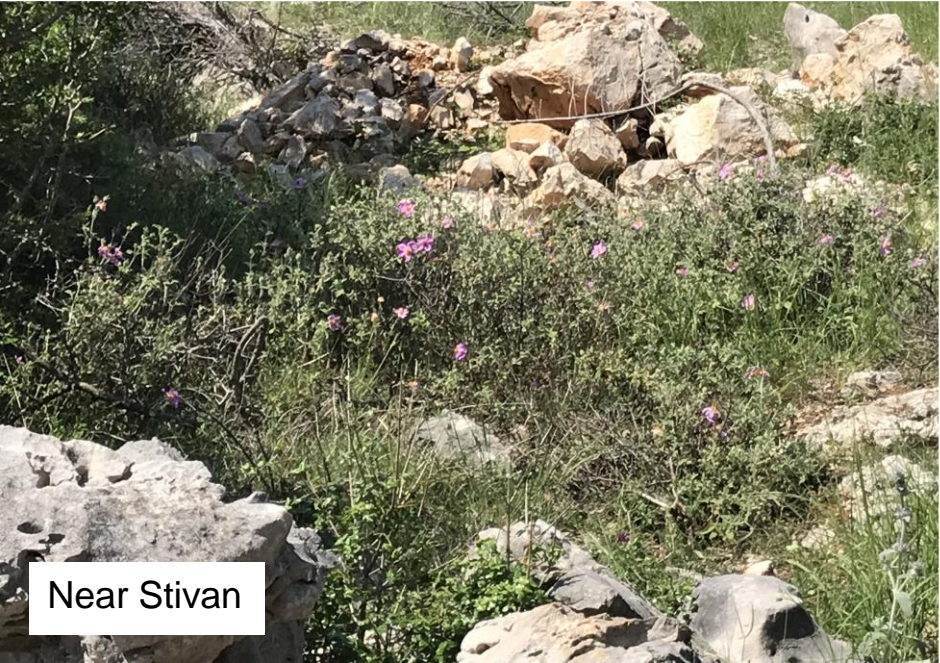

Near Stivan

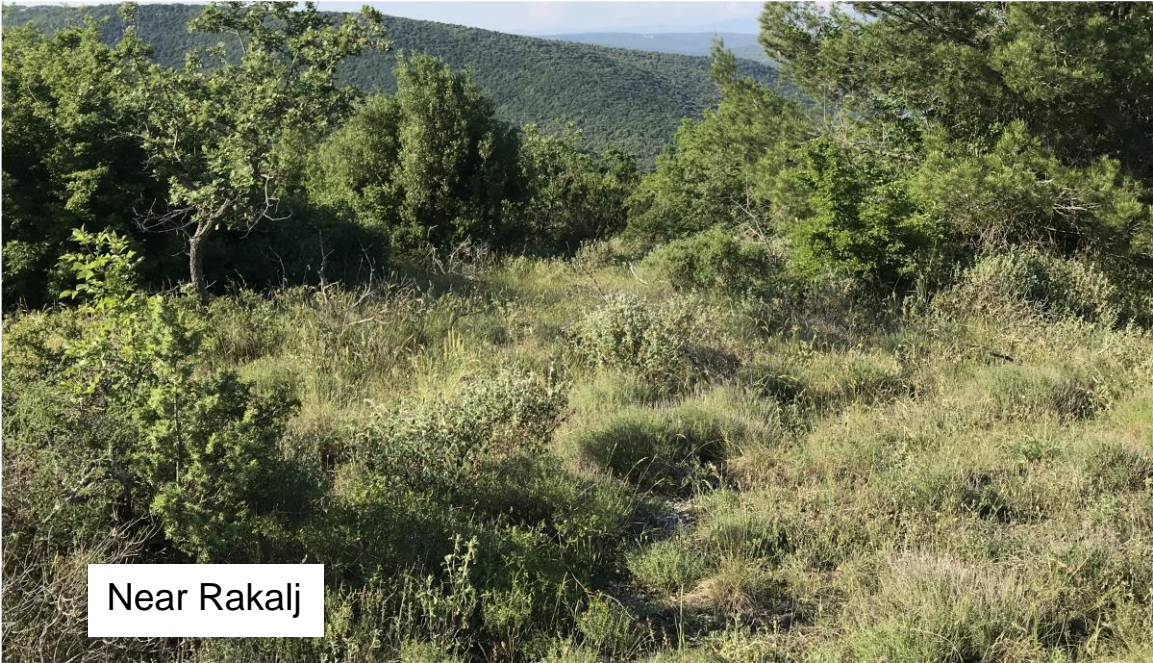

Near Rakalj

*C. creticus*, wild populations in Croatia

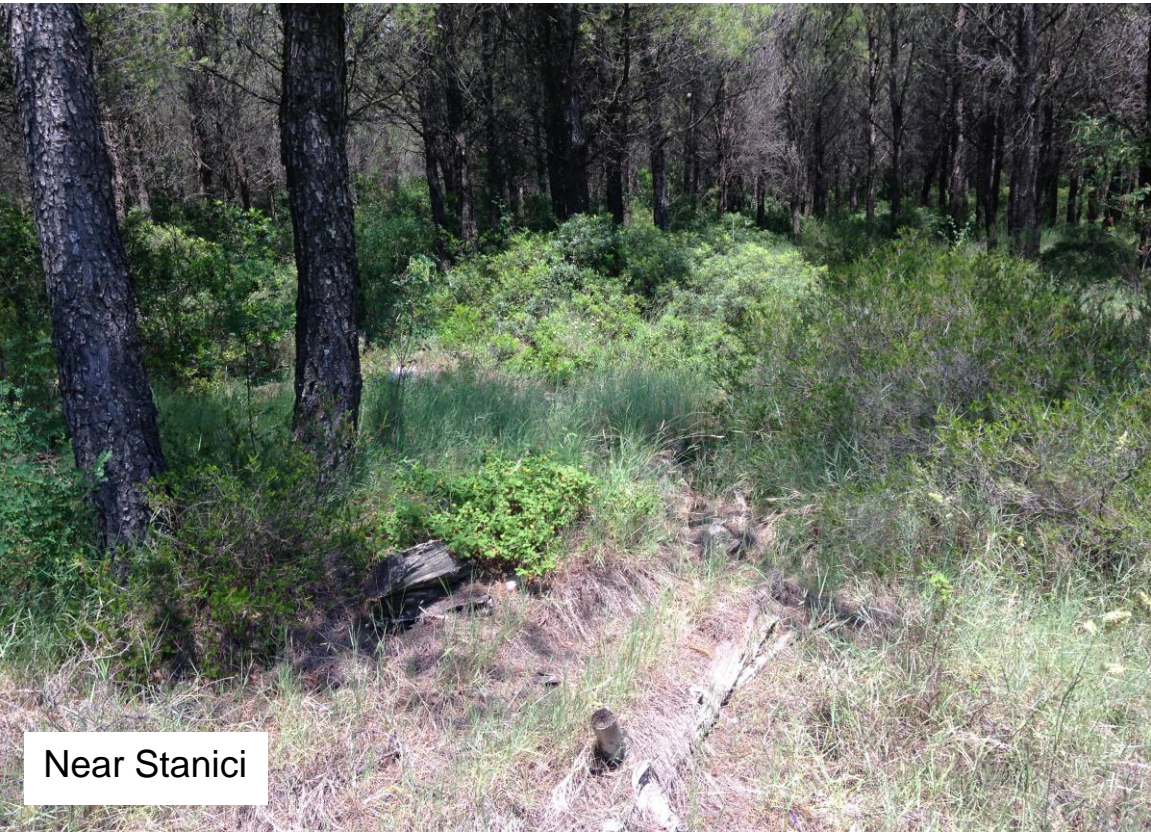

Near Stanici

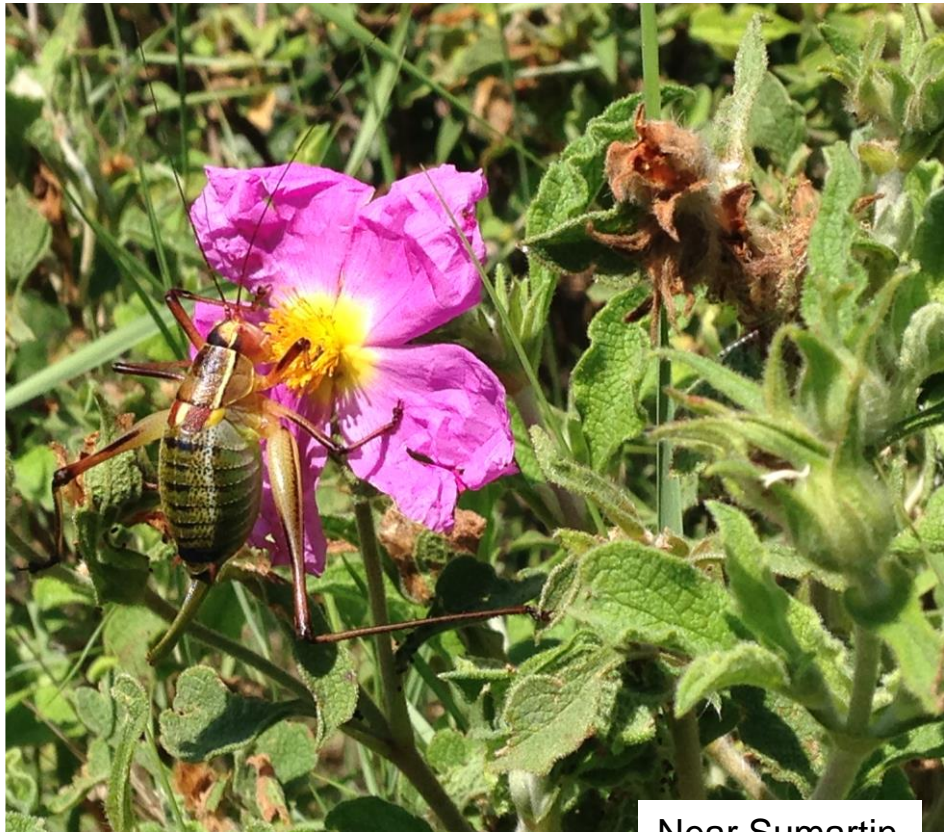

Near Sumartin

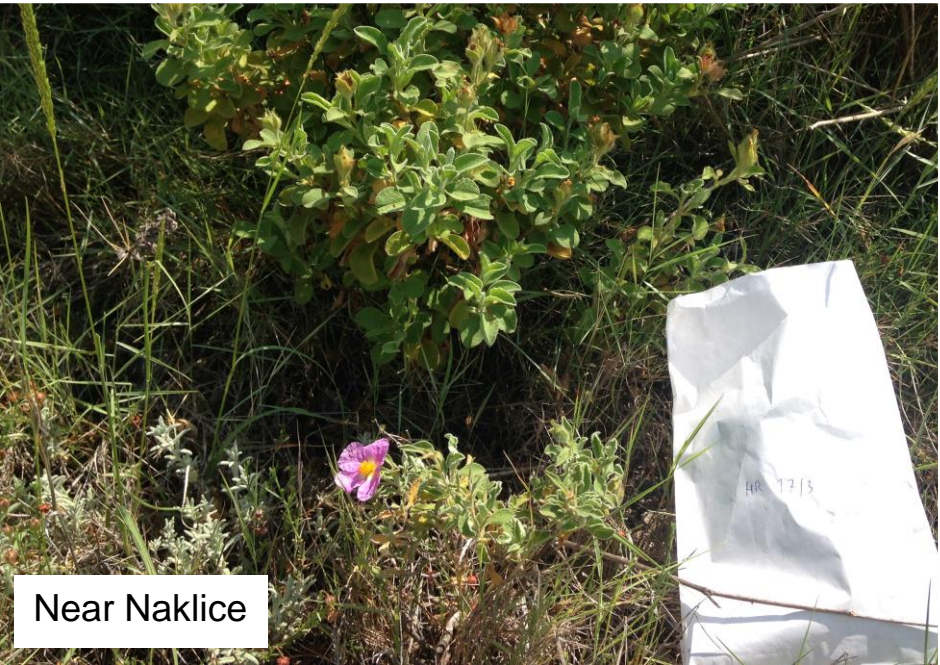

Near Naklice

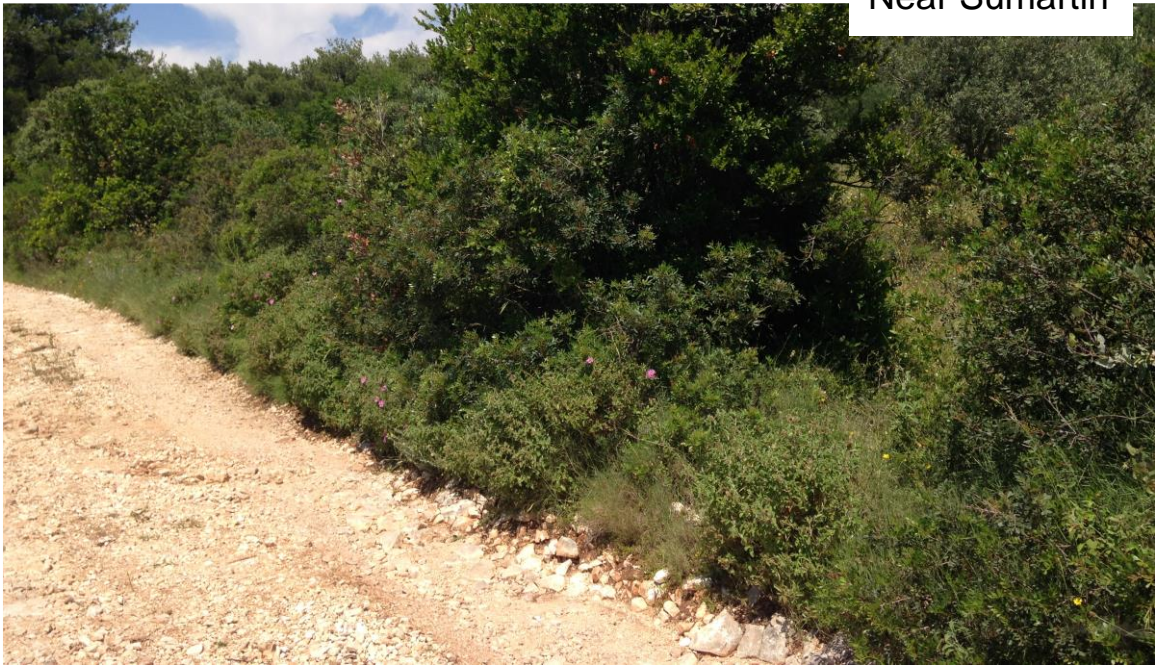

SC1, *C. creticus*, Albania, intra-population variability of flower color

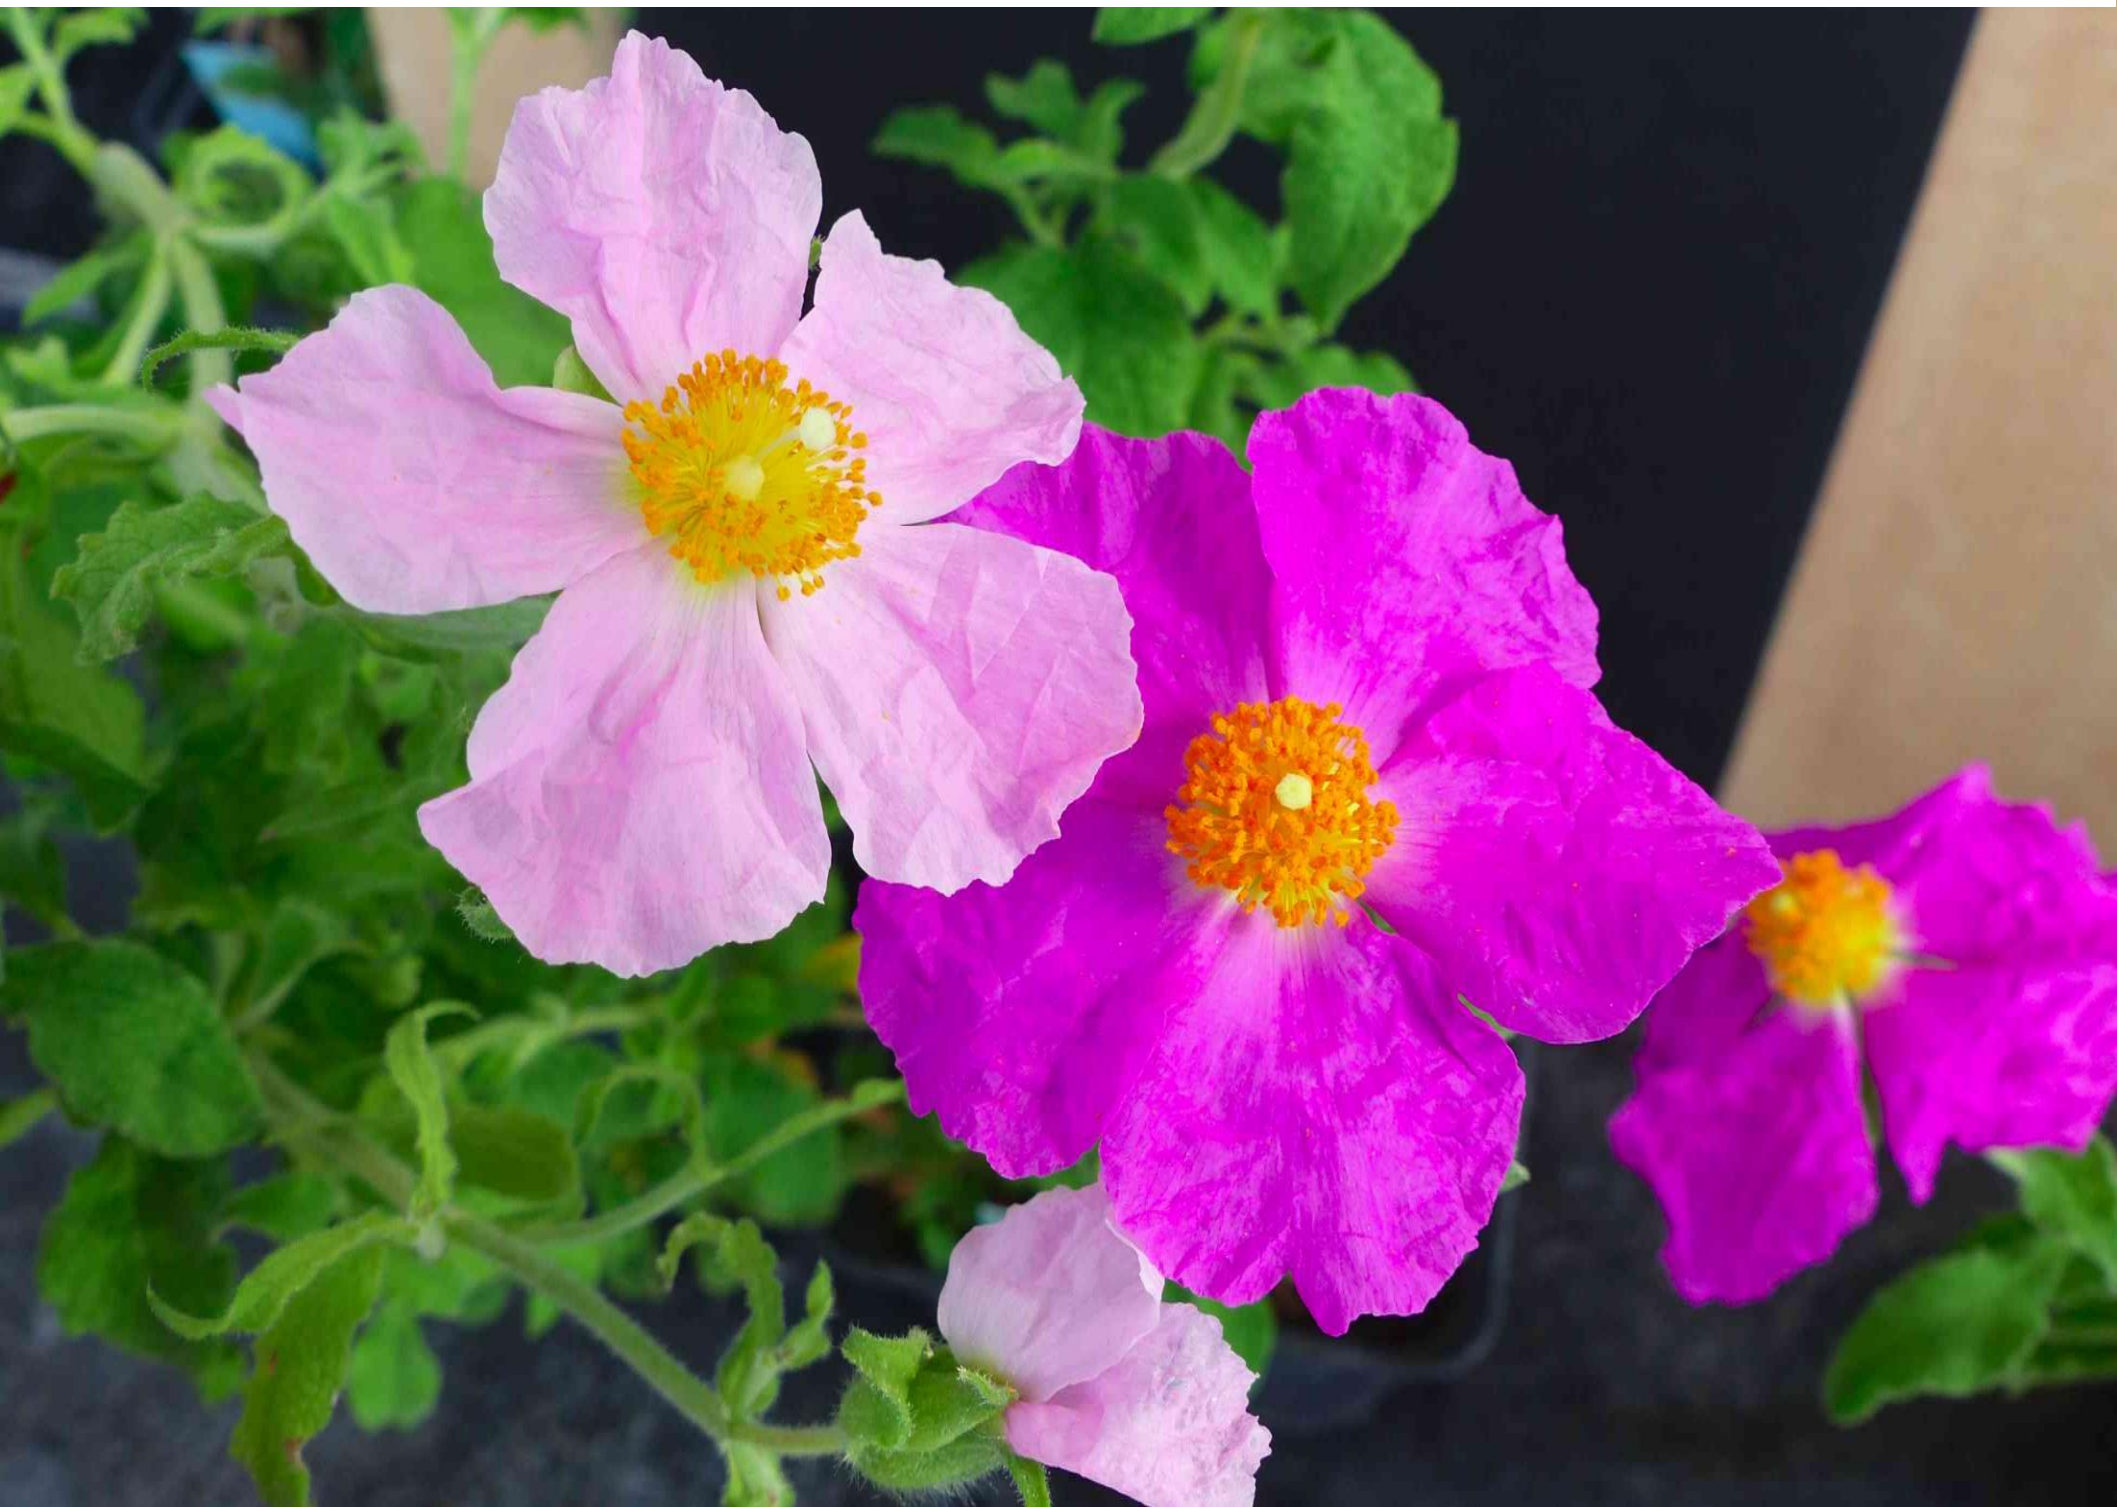

SC2, *C. creticus*, Albania

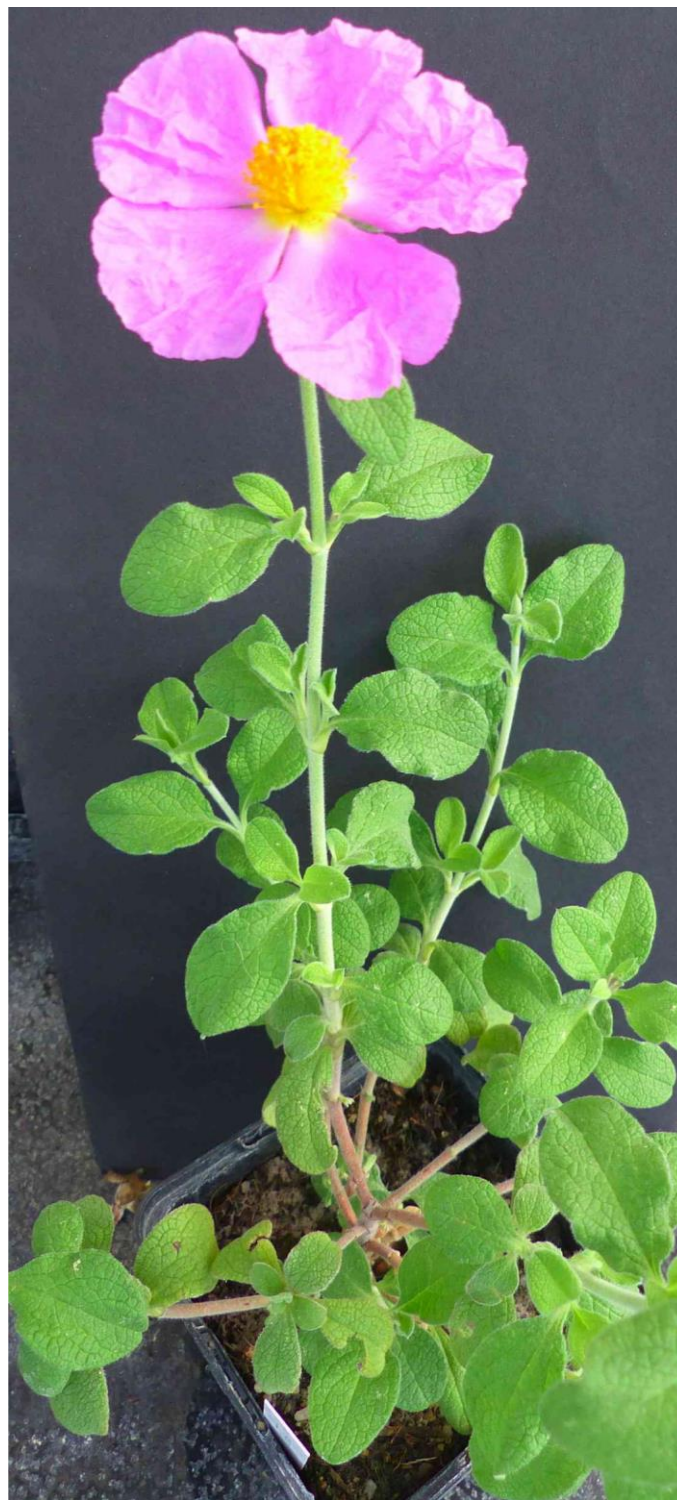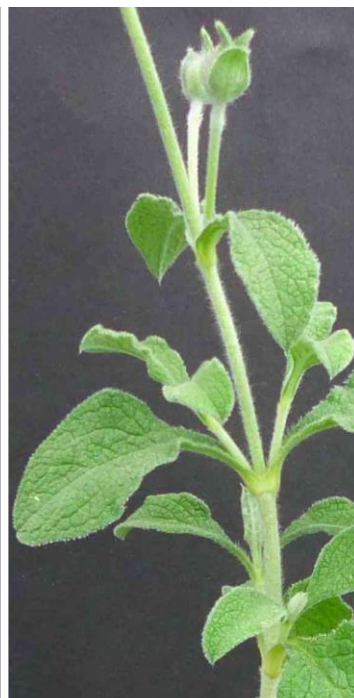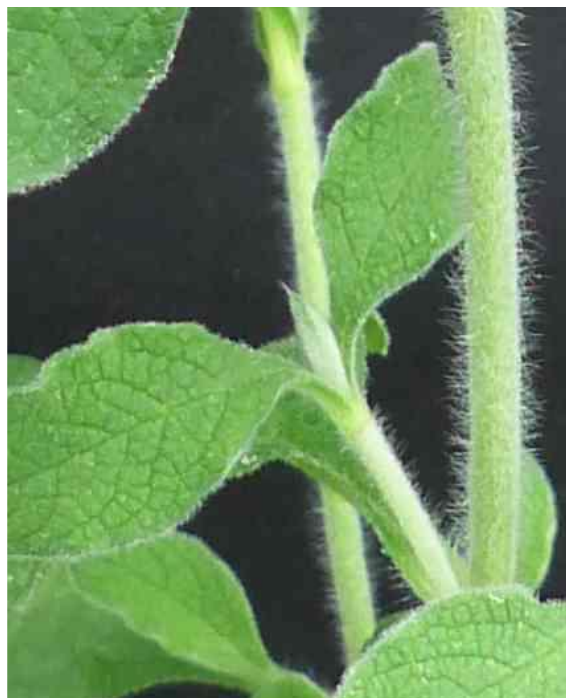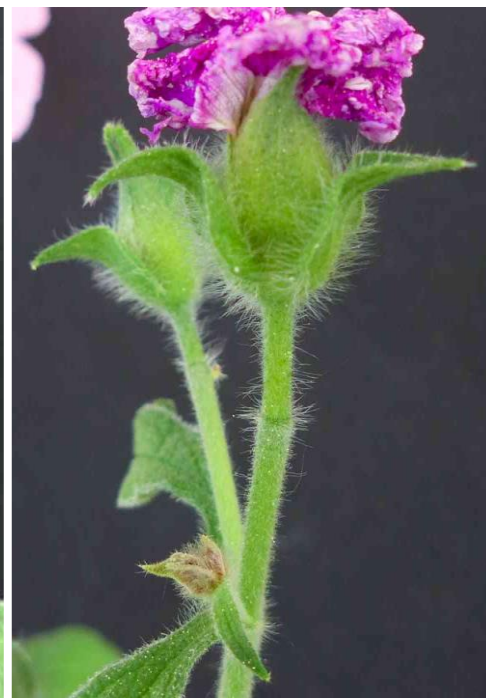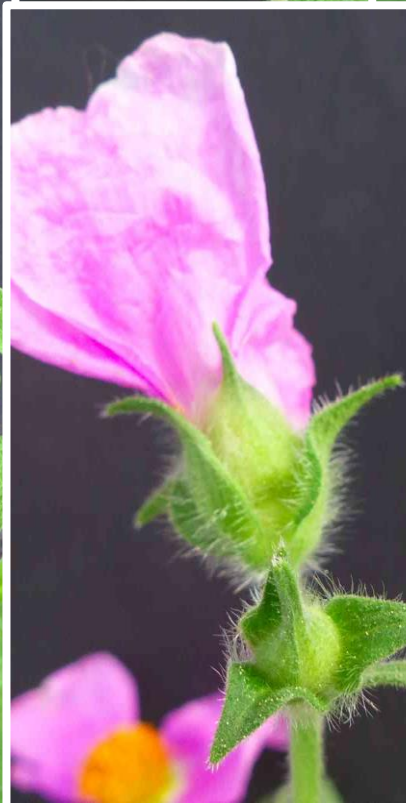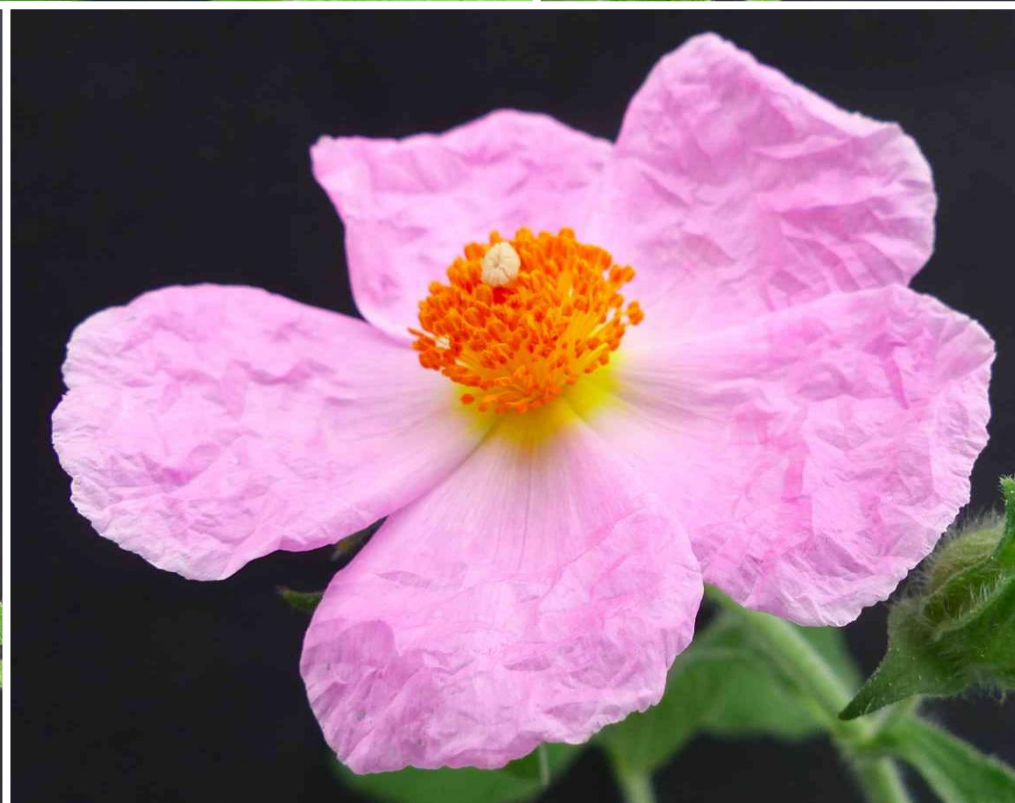

*C. creticus*, wild populations in Albania

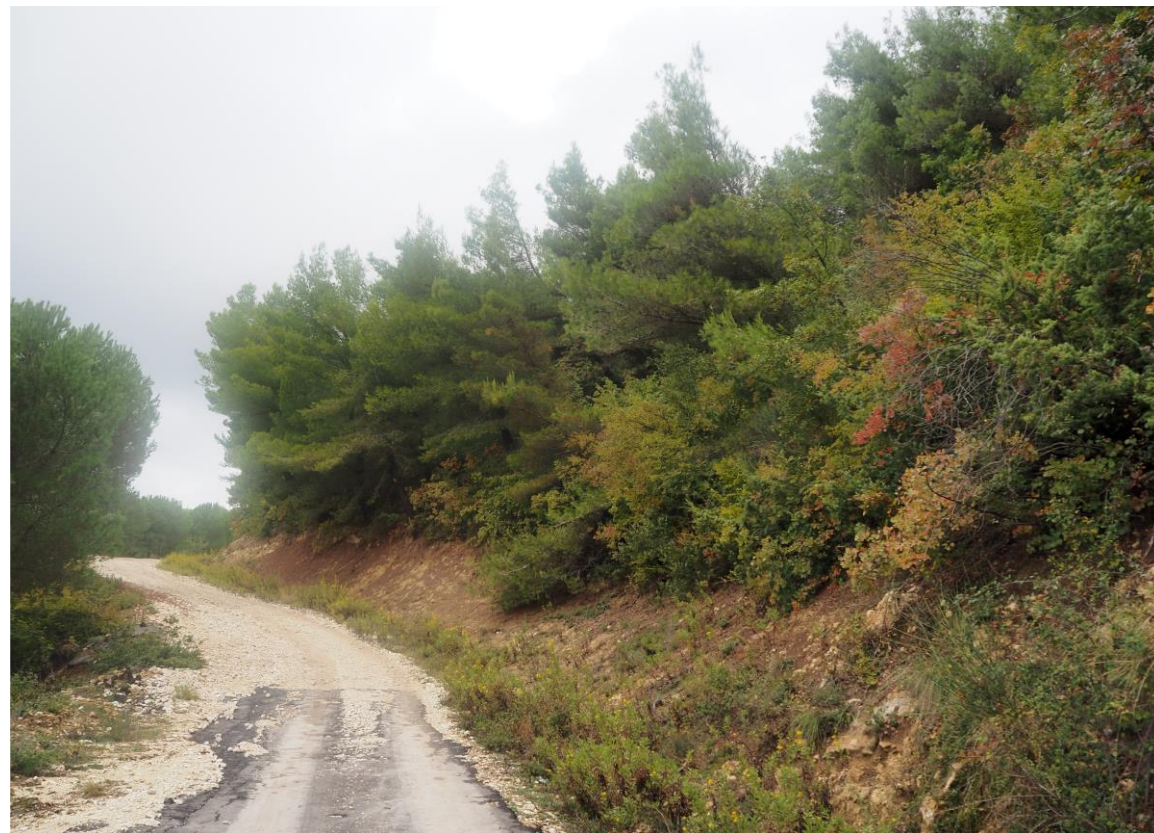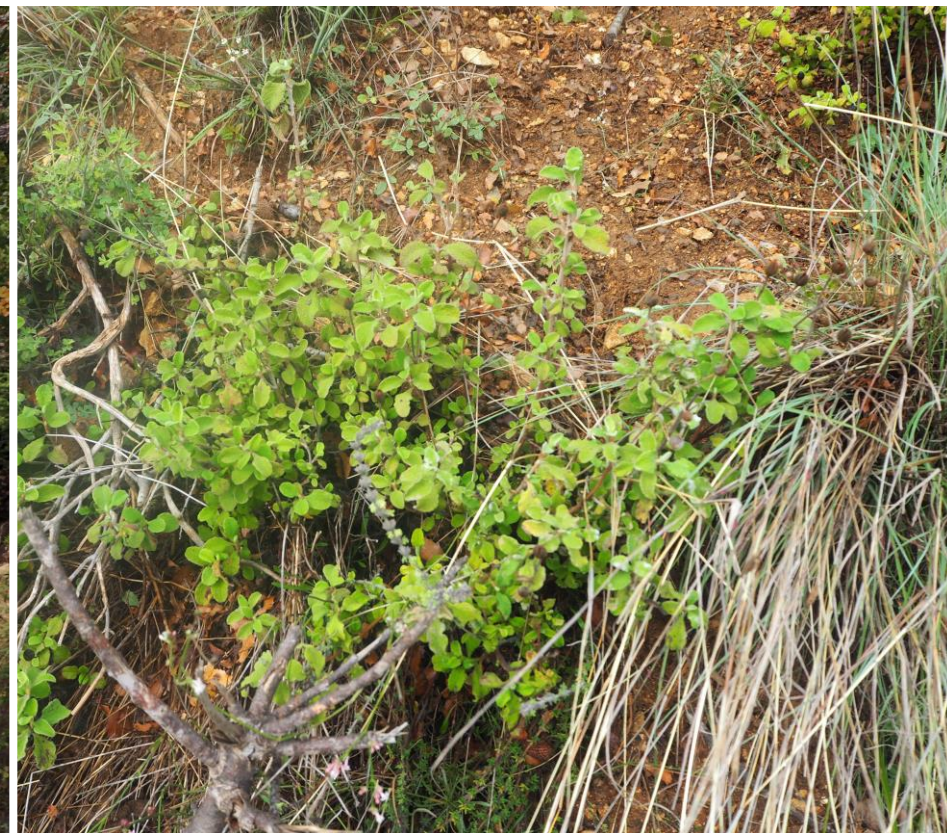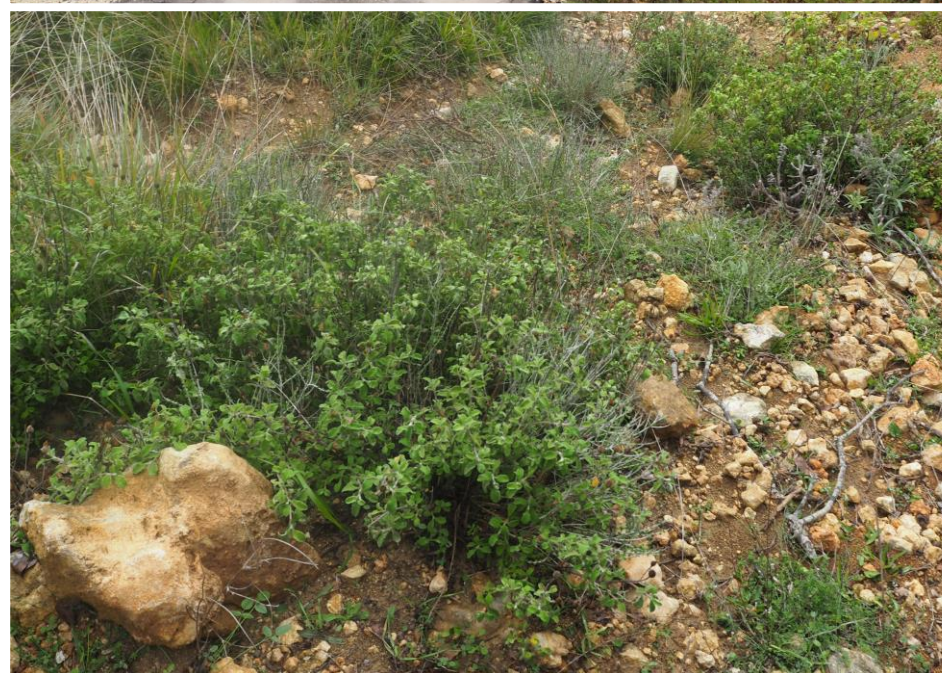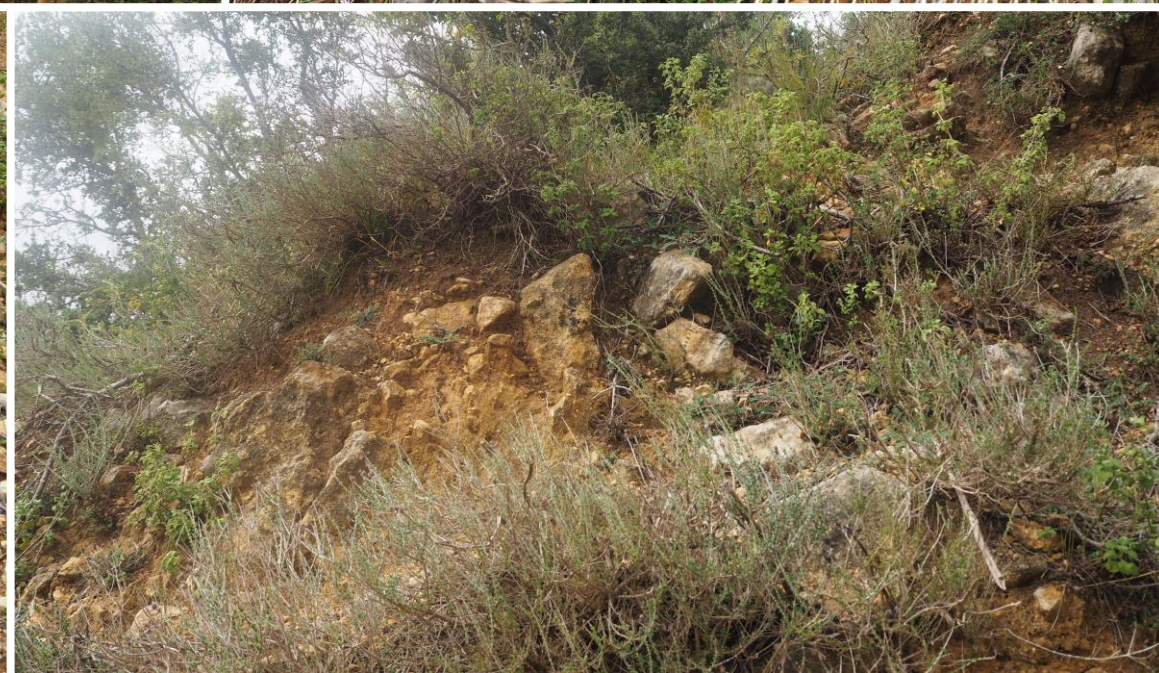

SC21, *C. creticus*, Greece

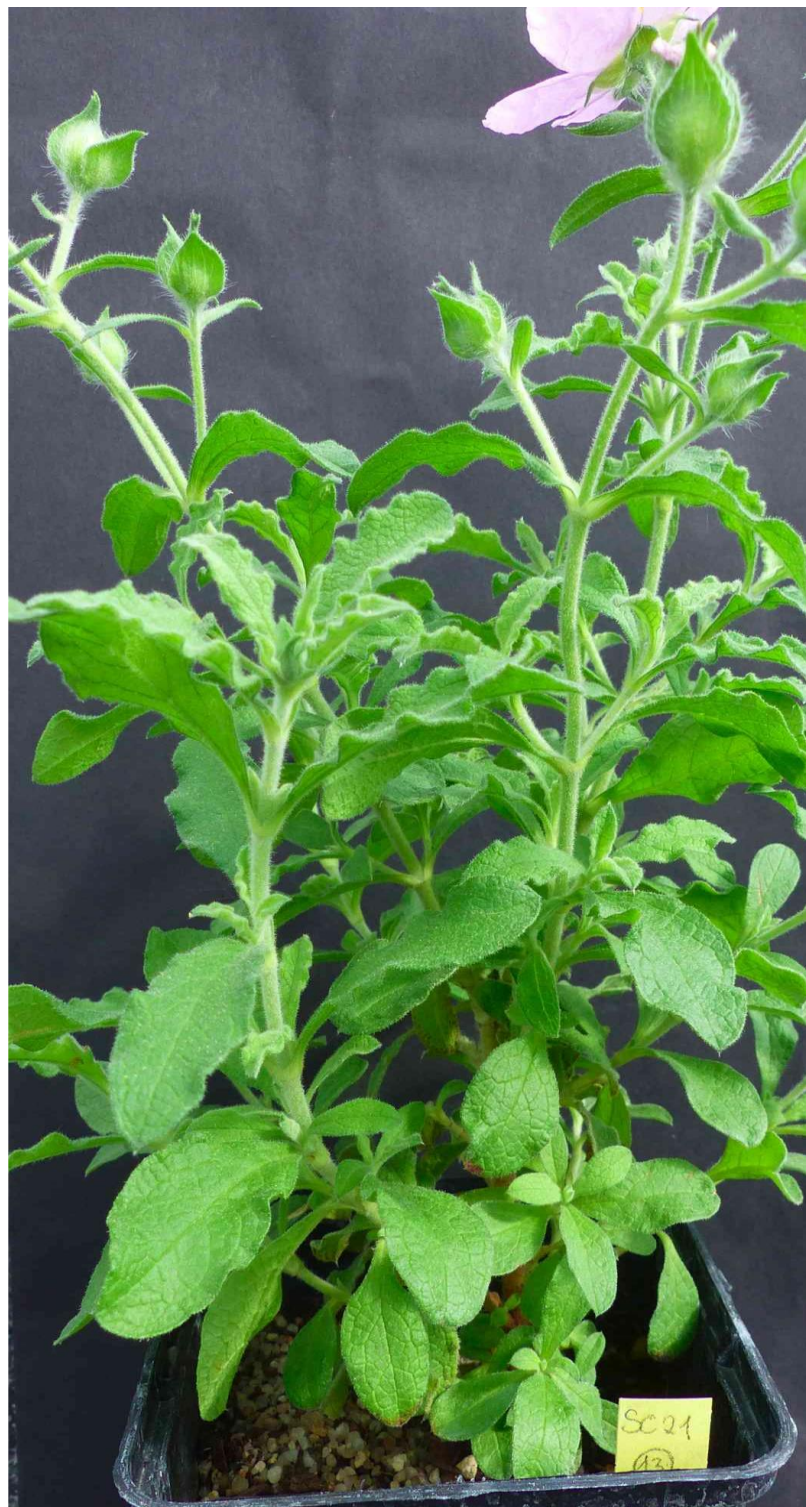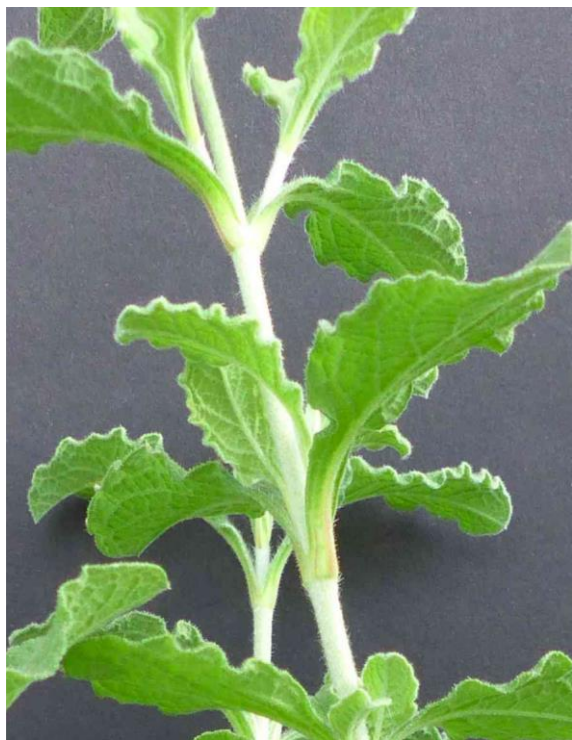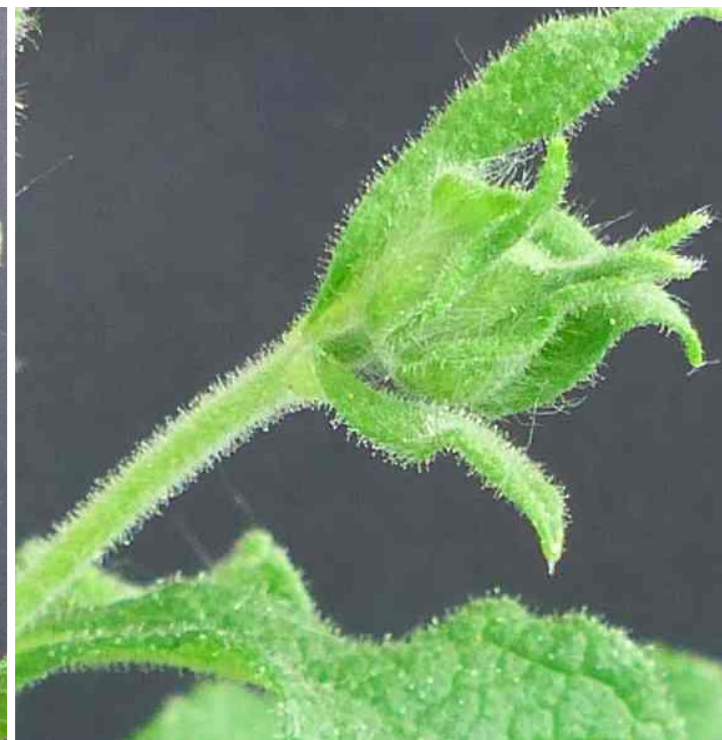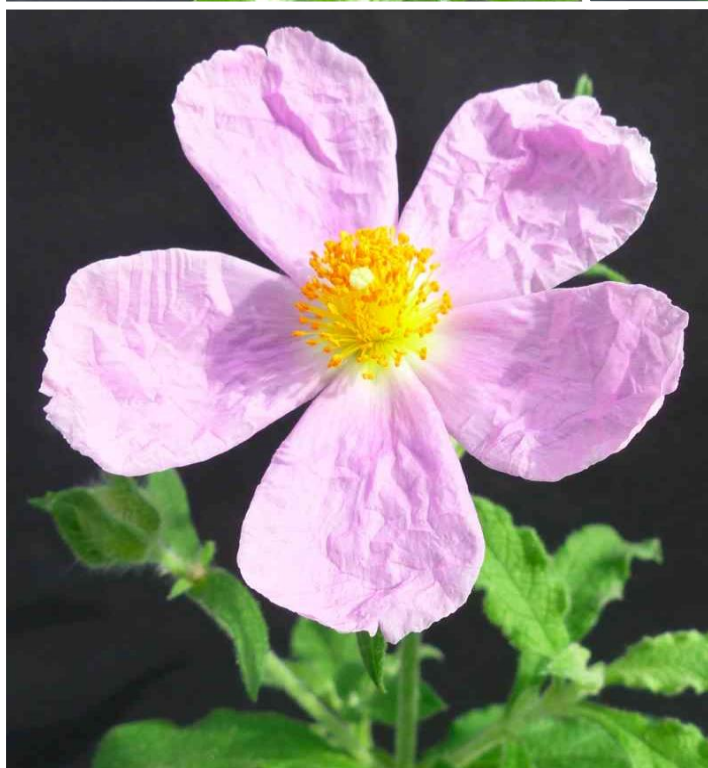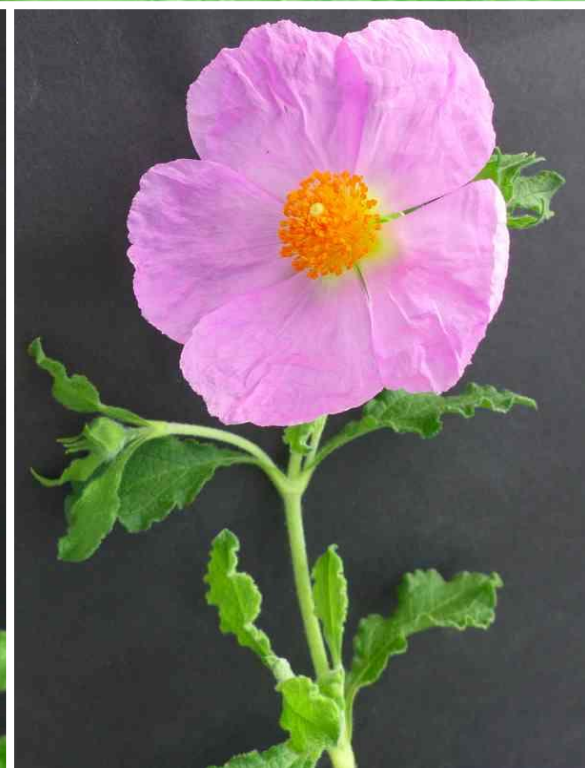

SC22, *C. creticus*, Greece

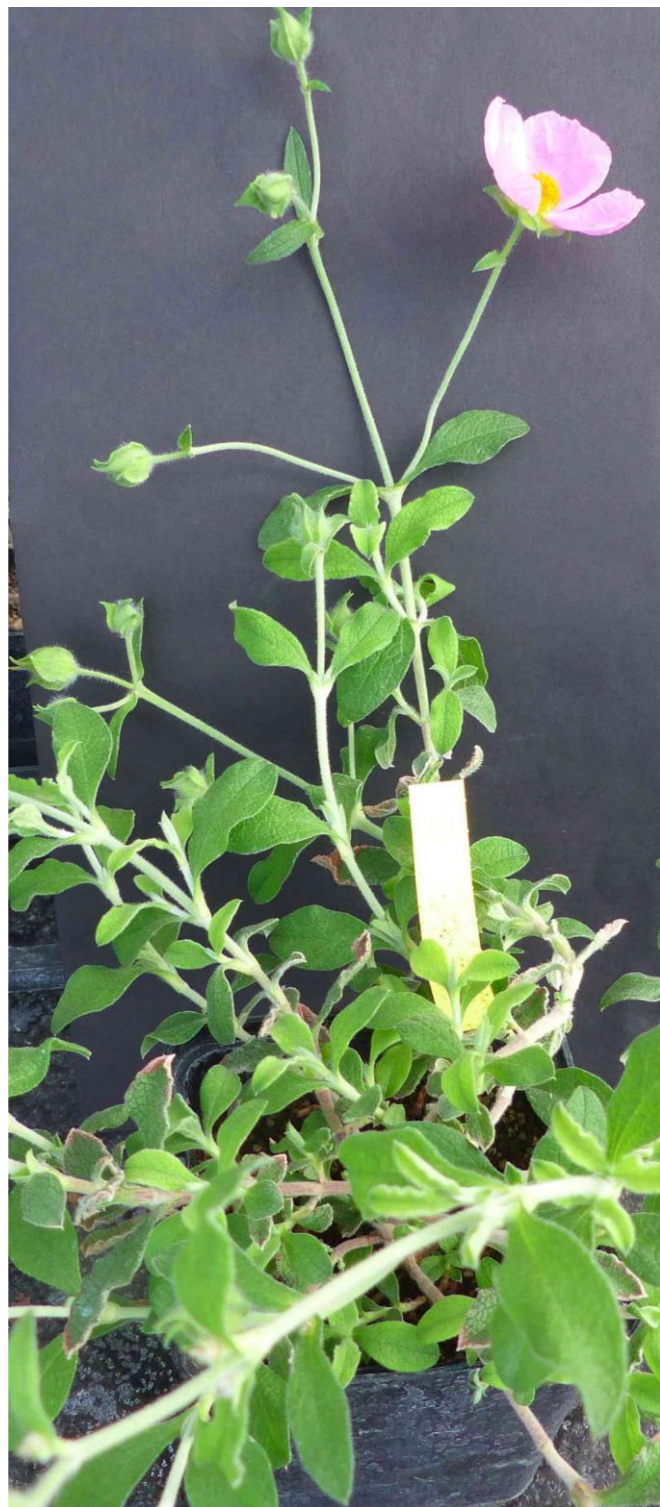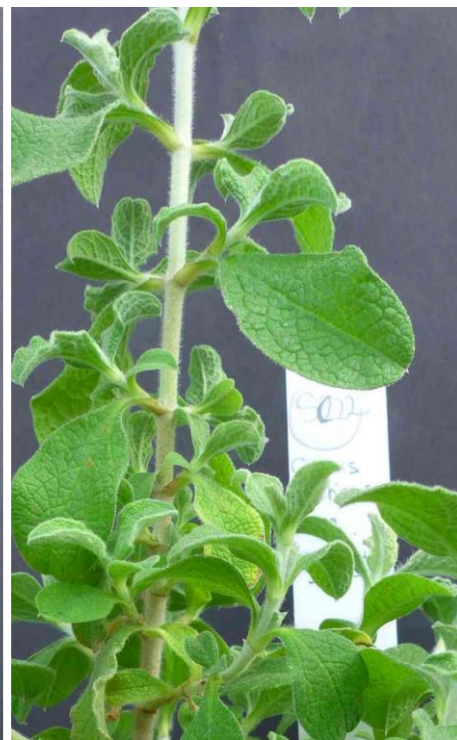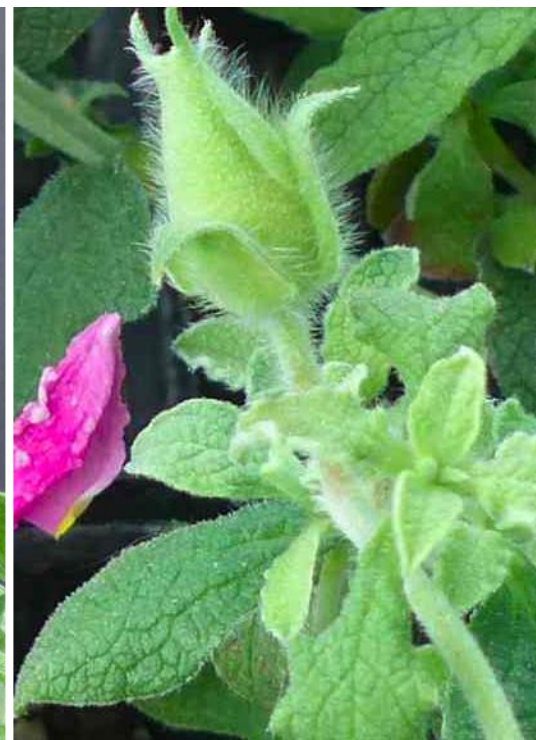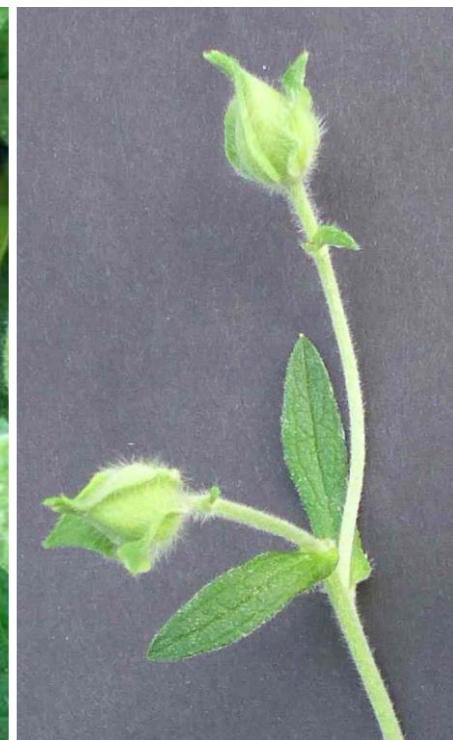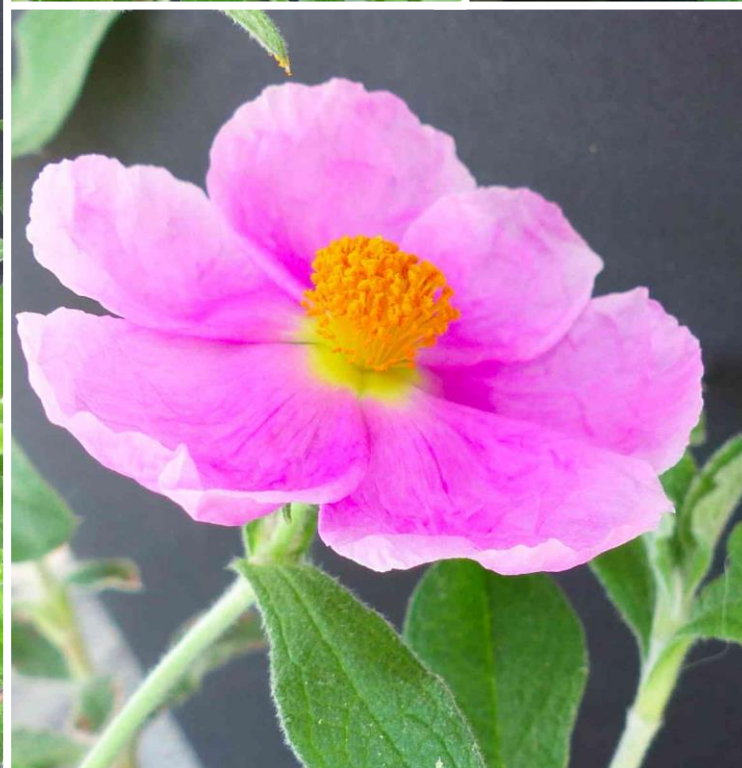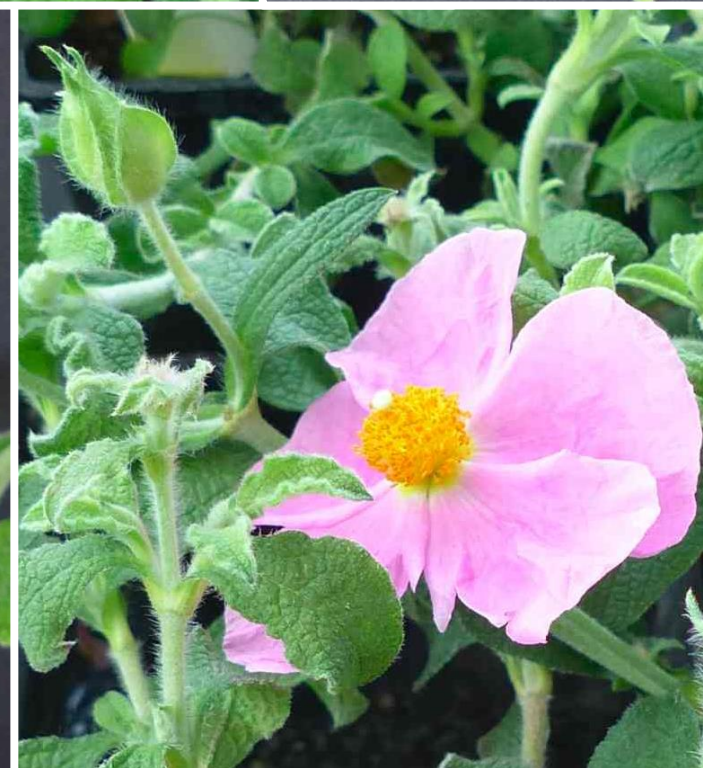

SC19, *C. creticus*, Cyprus

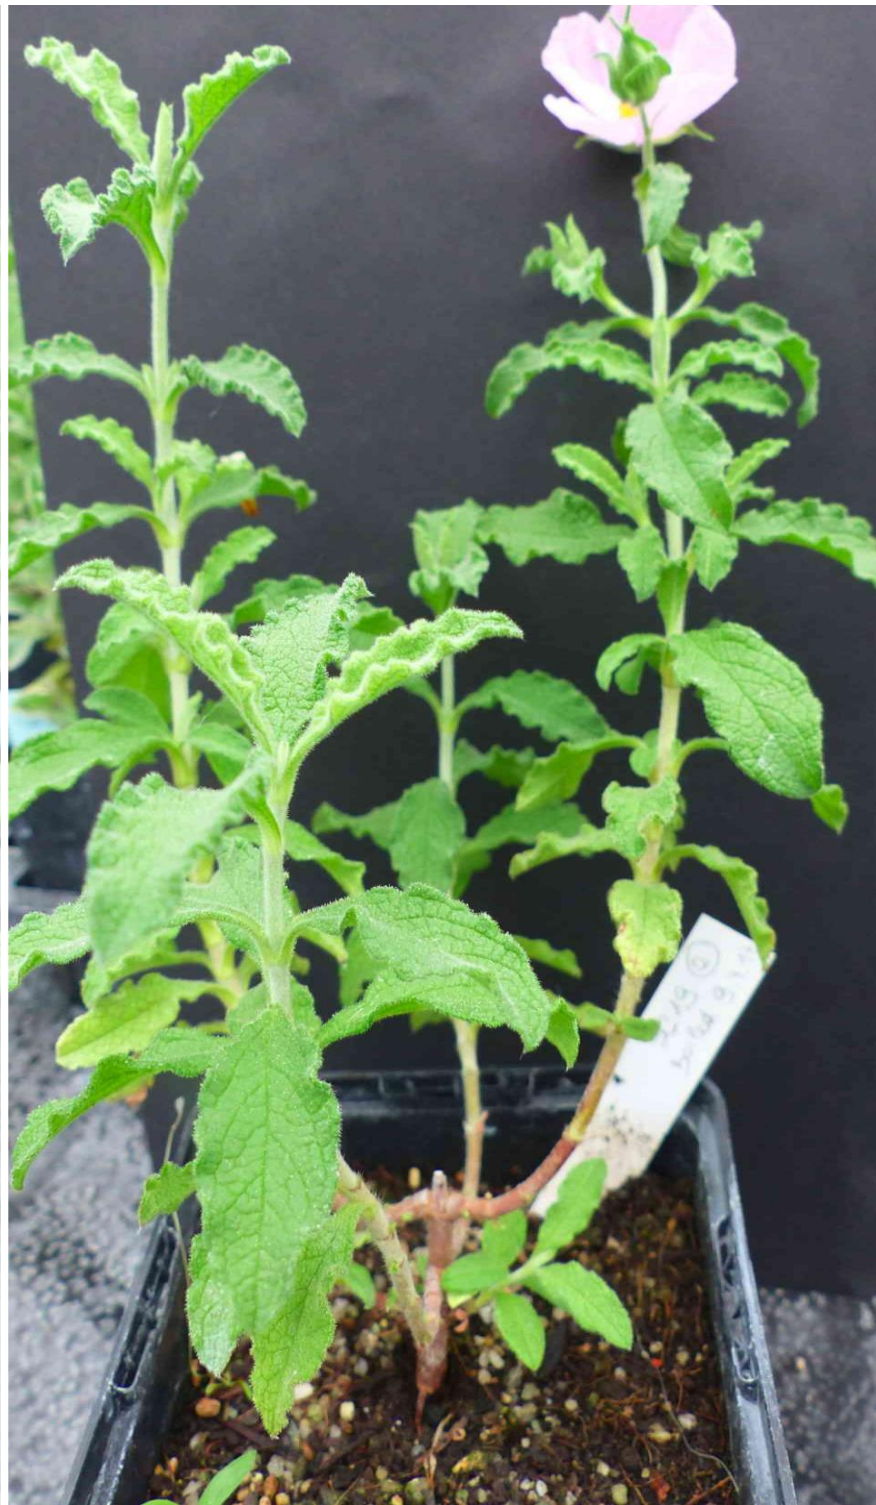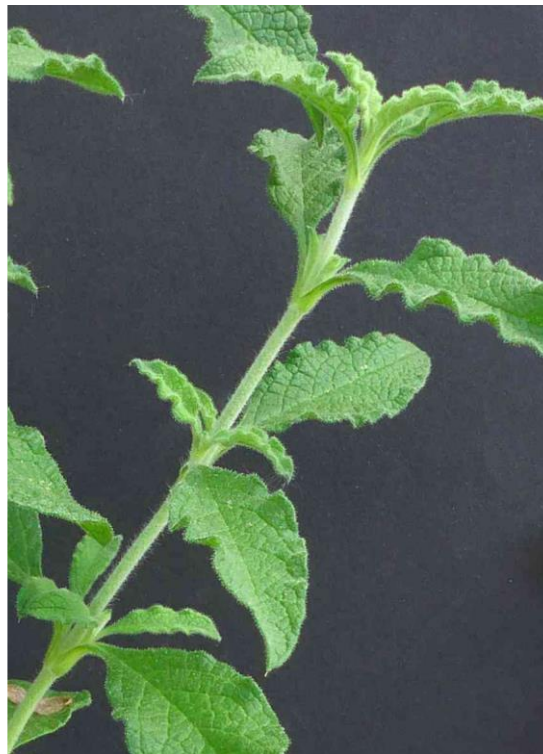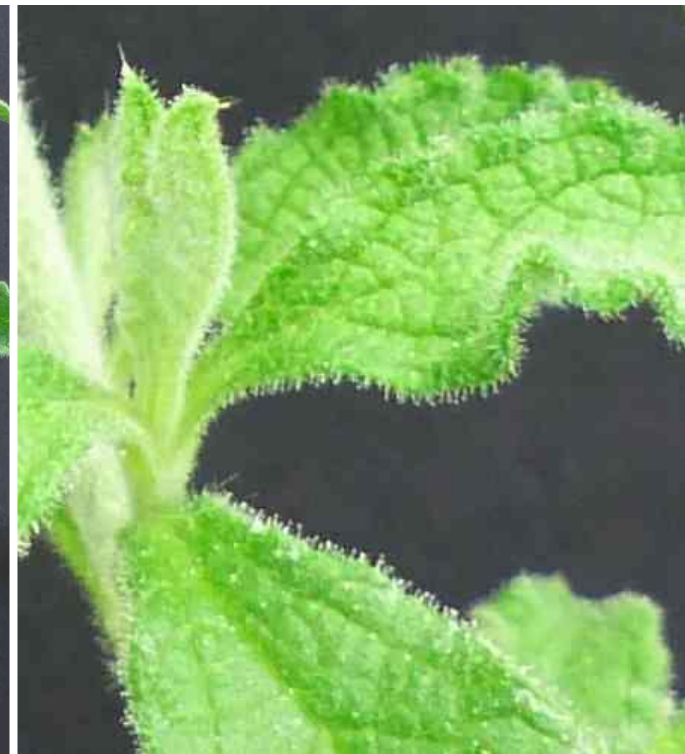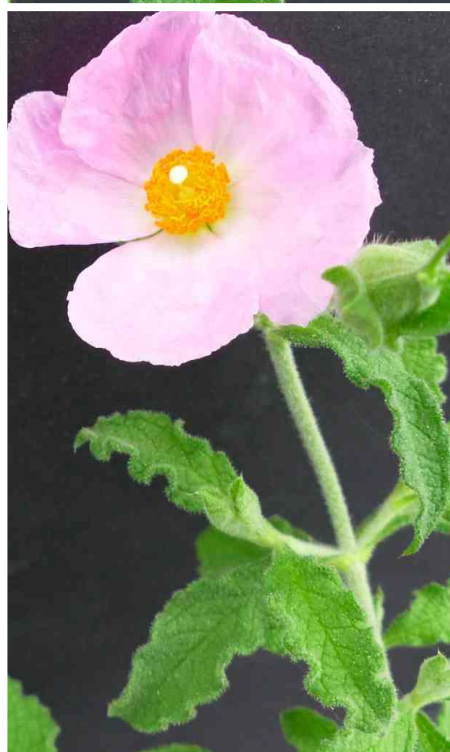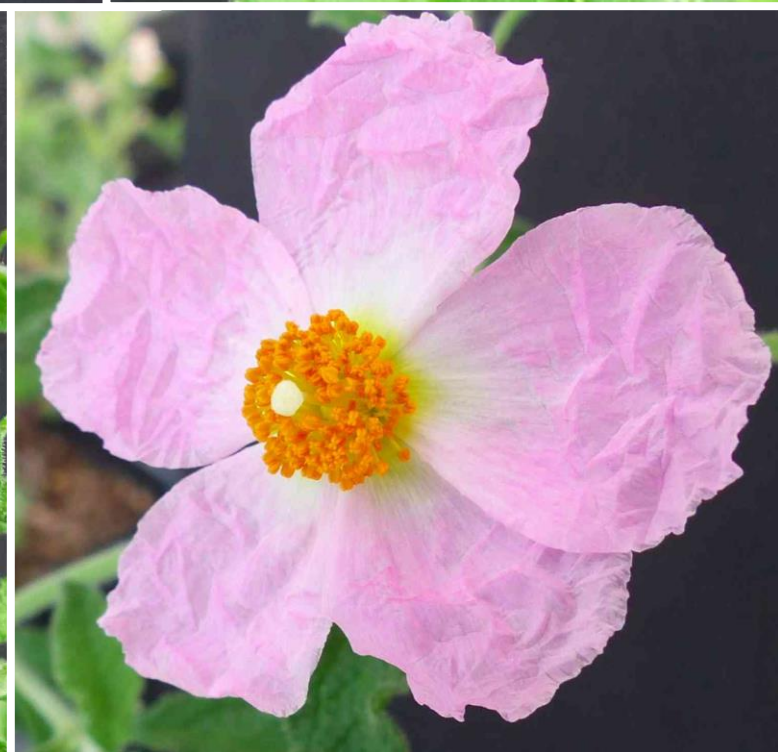

*C. creticus*, wild populations in Cyprus

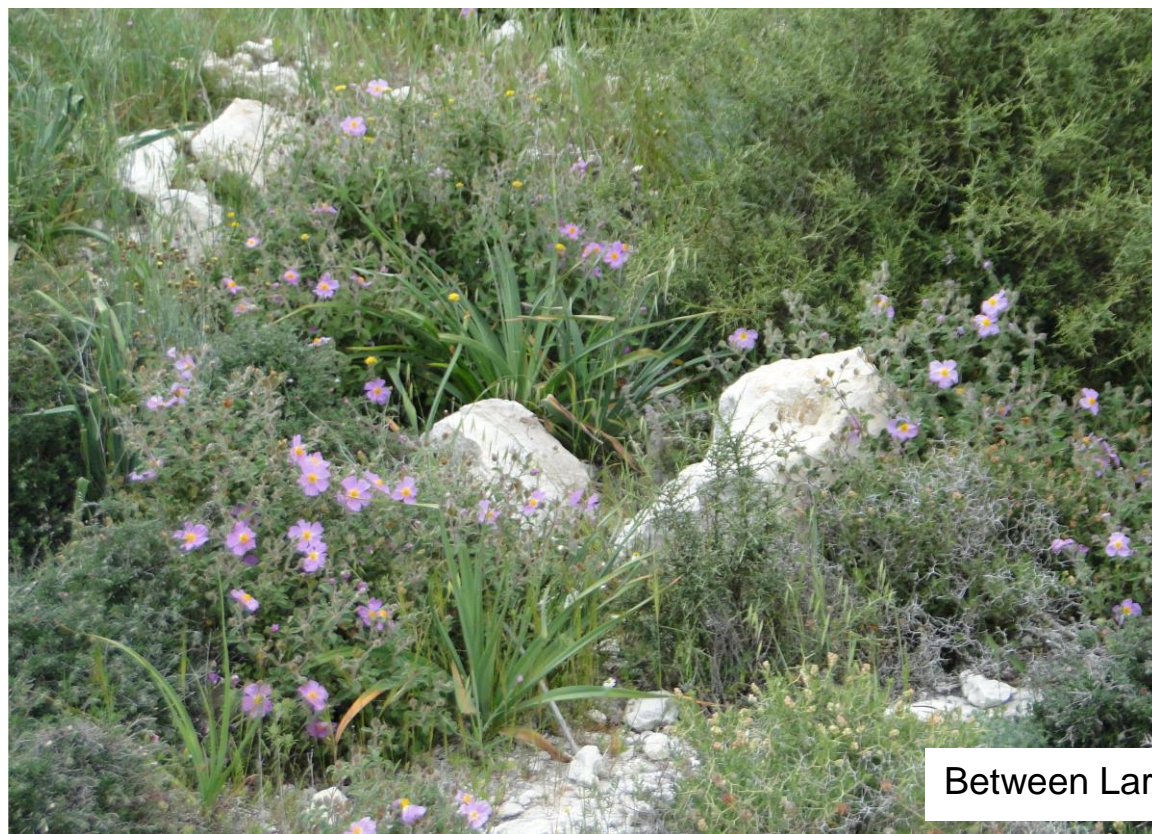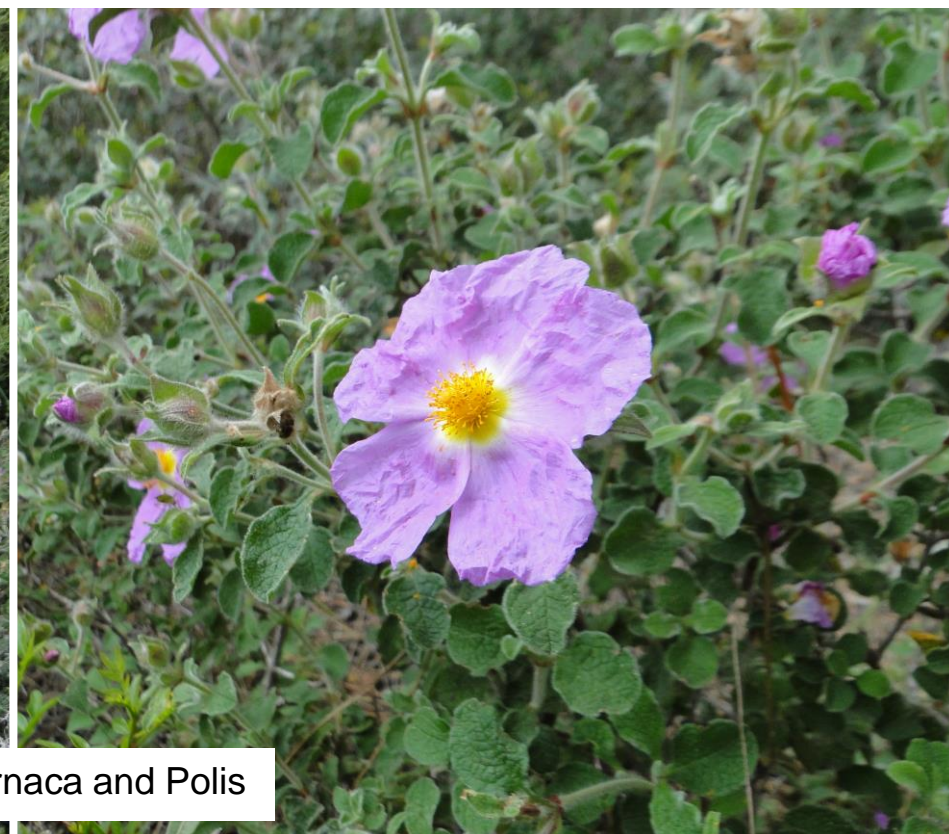

Between Larnaca and Polis

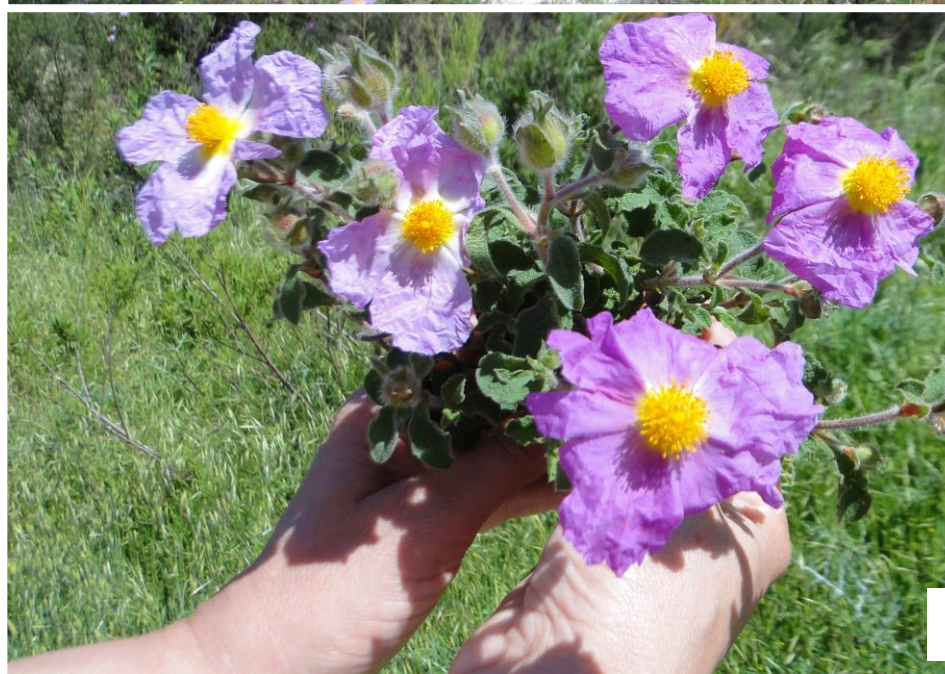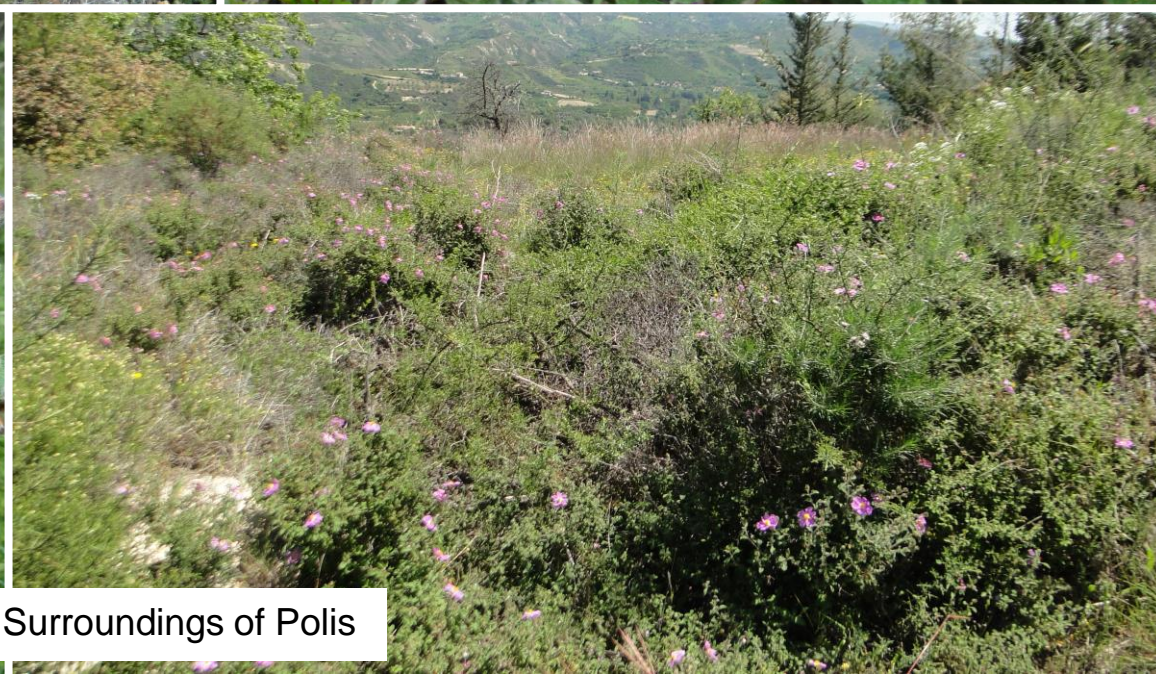

Surroundings of Polis

*C. creticus*, wild populations in Cyprus

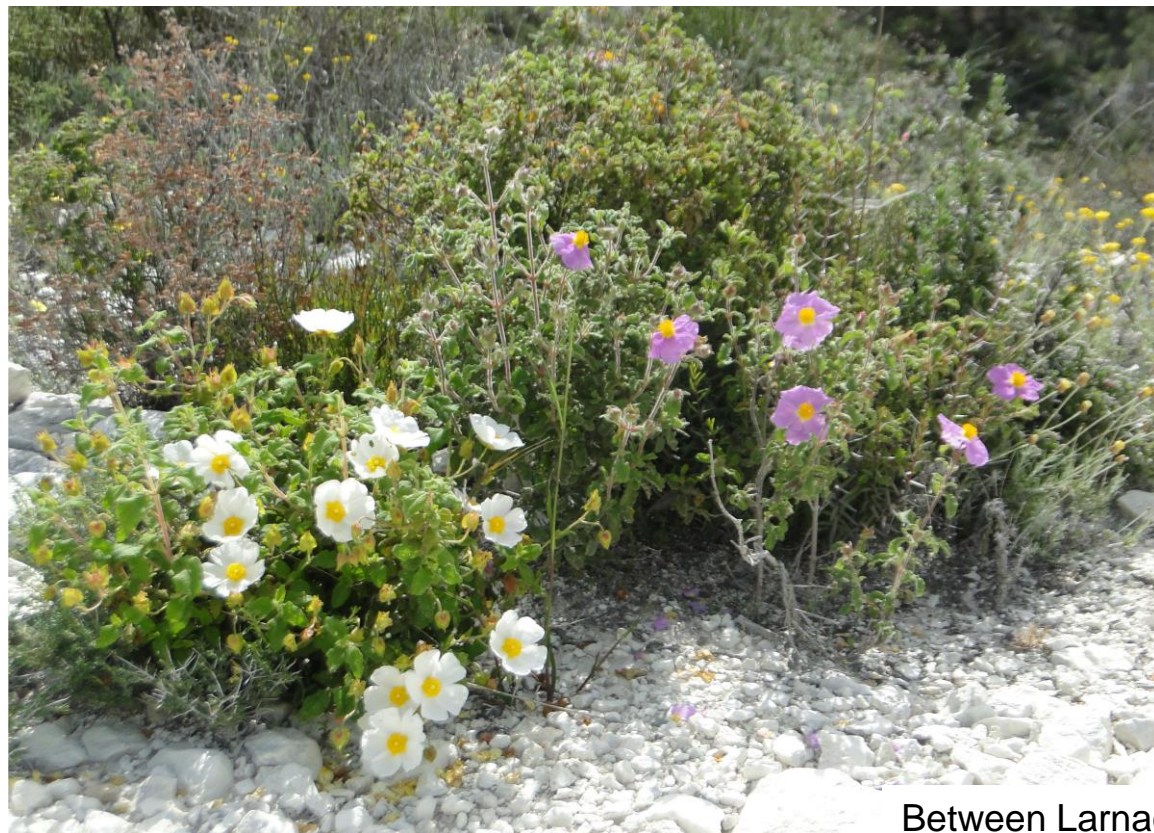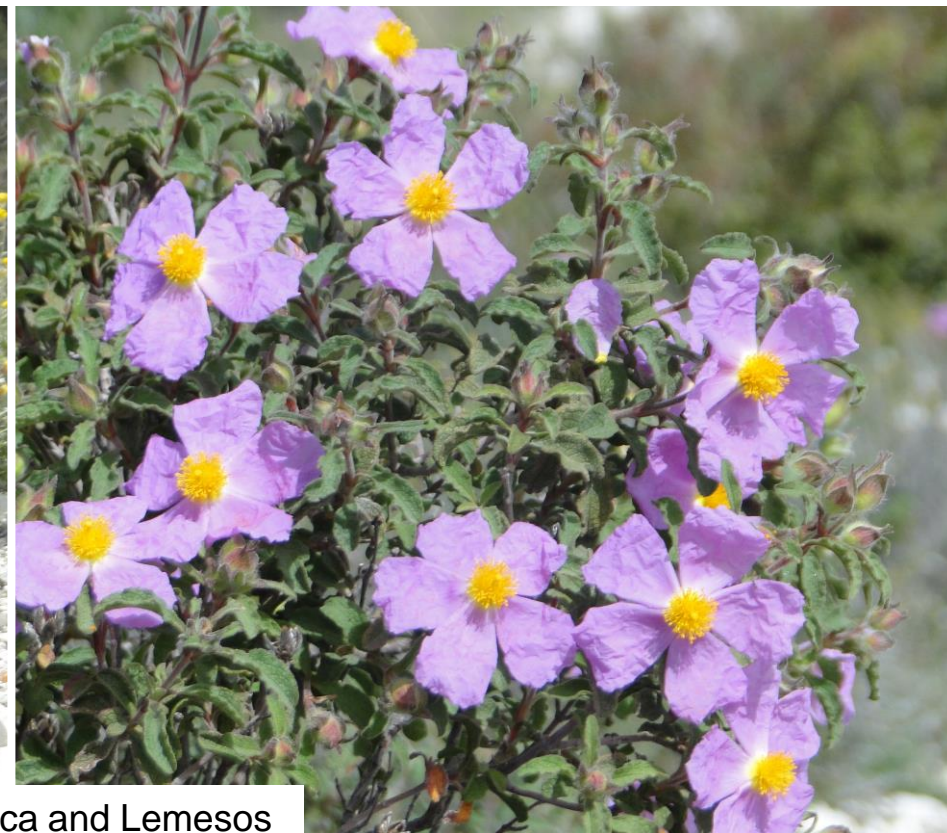

Between Larnaca and Lemesos

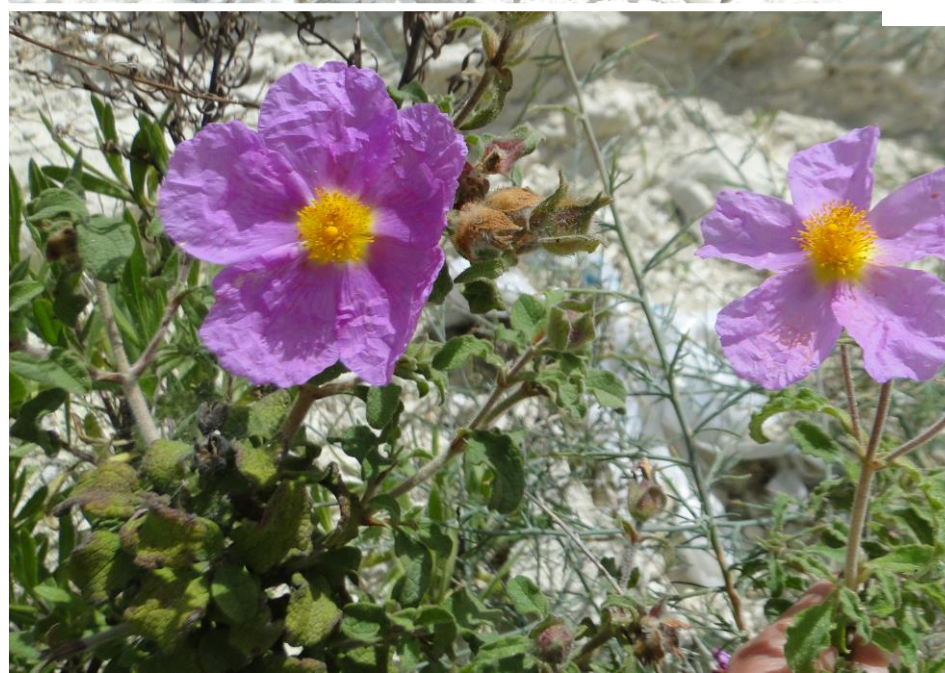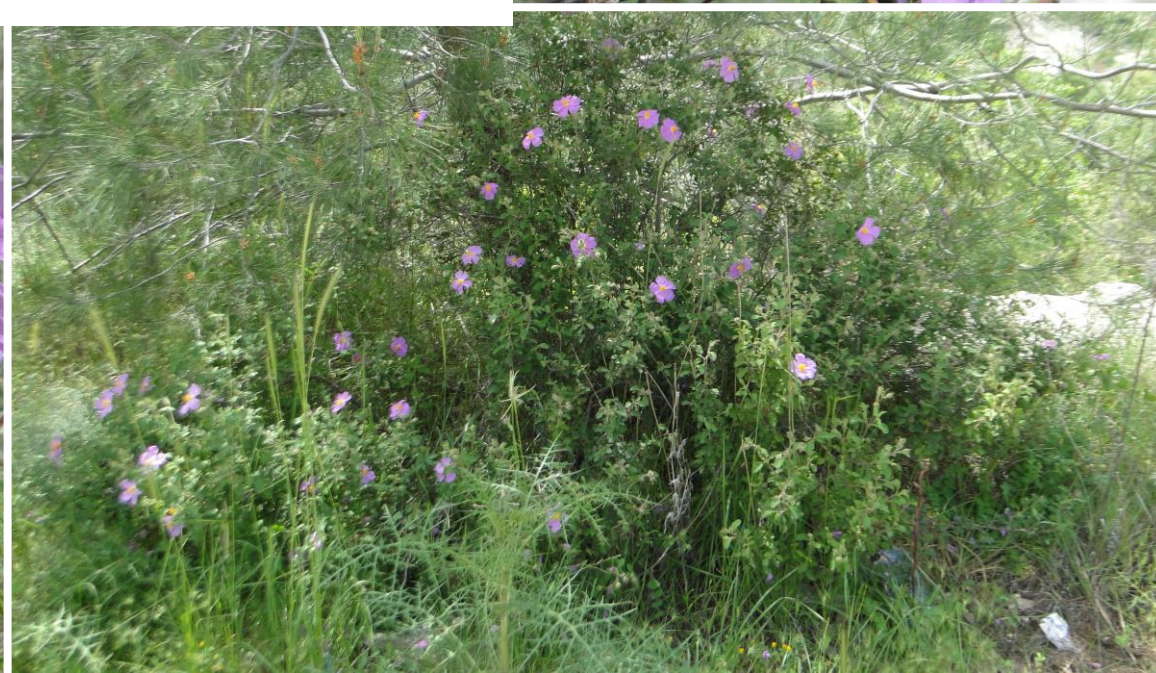

SC12, *C. creticus*, Lebanon

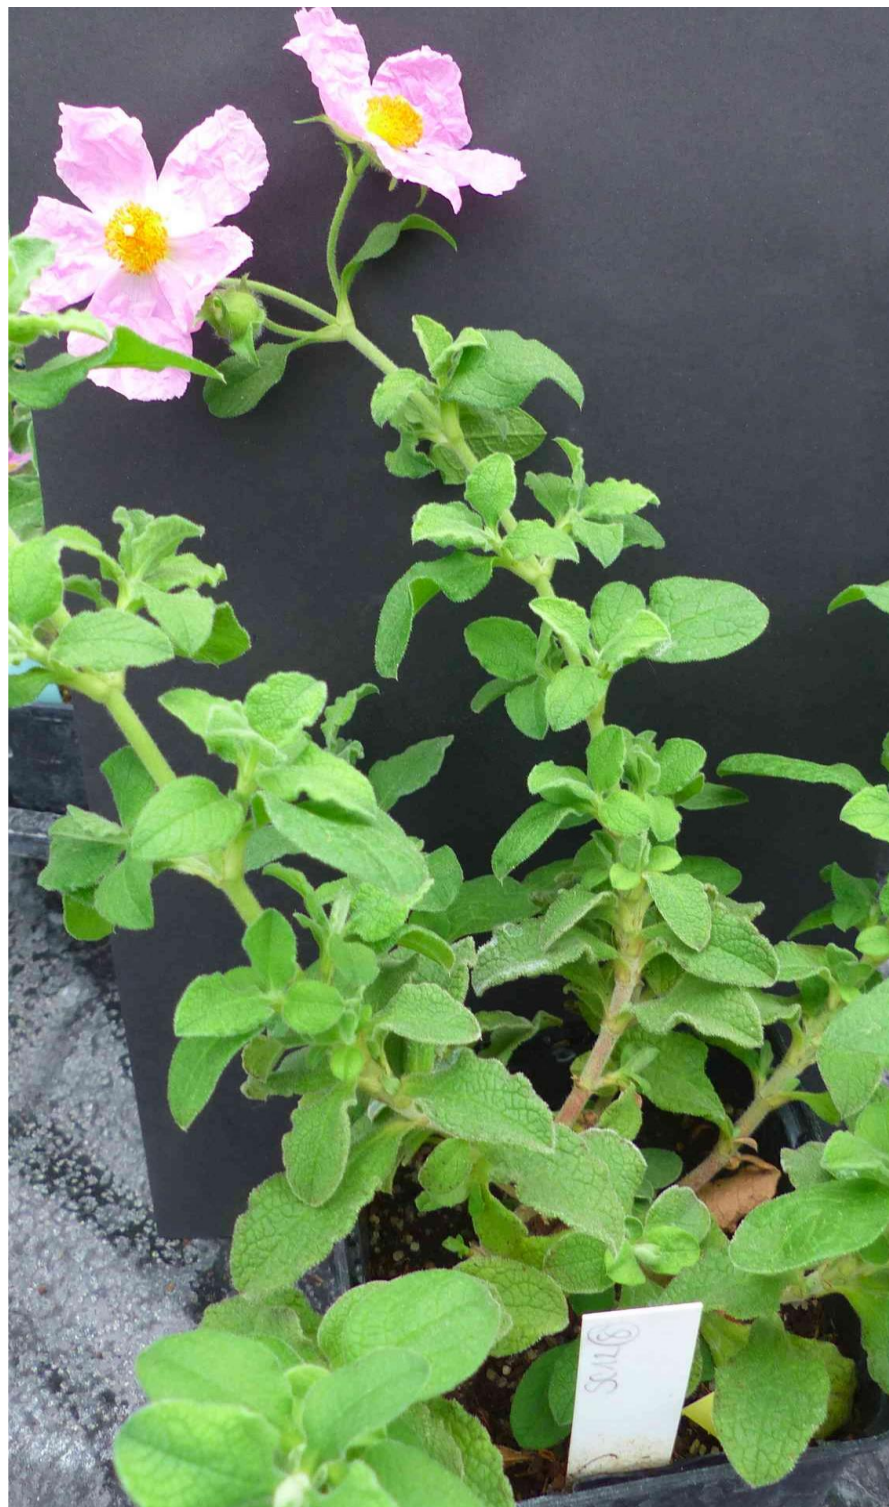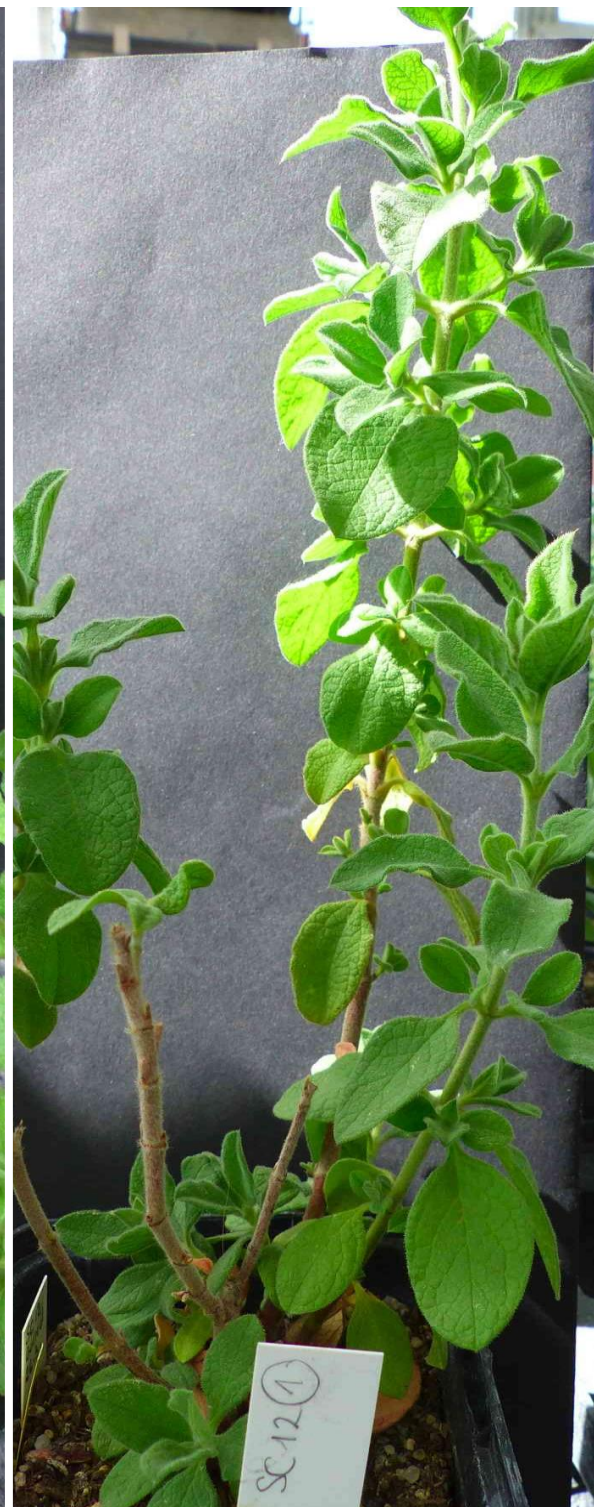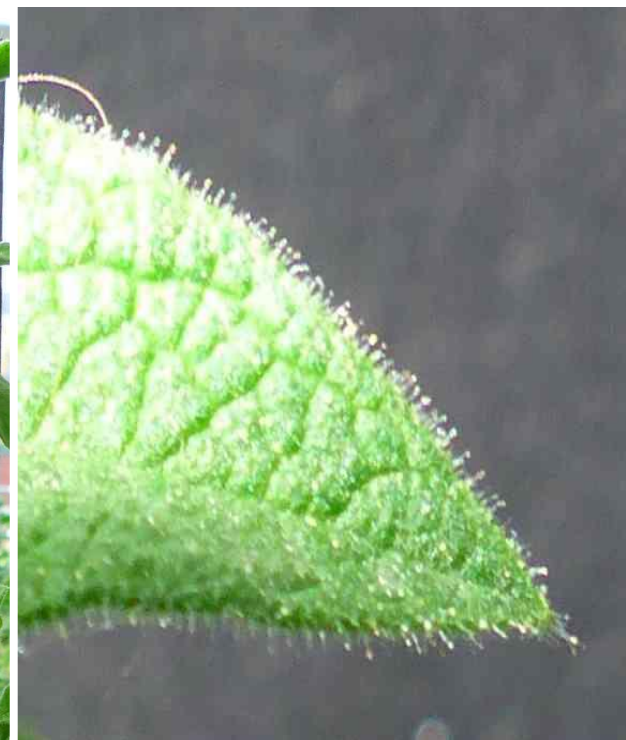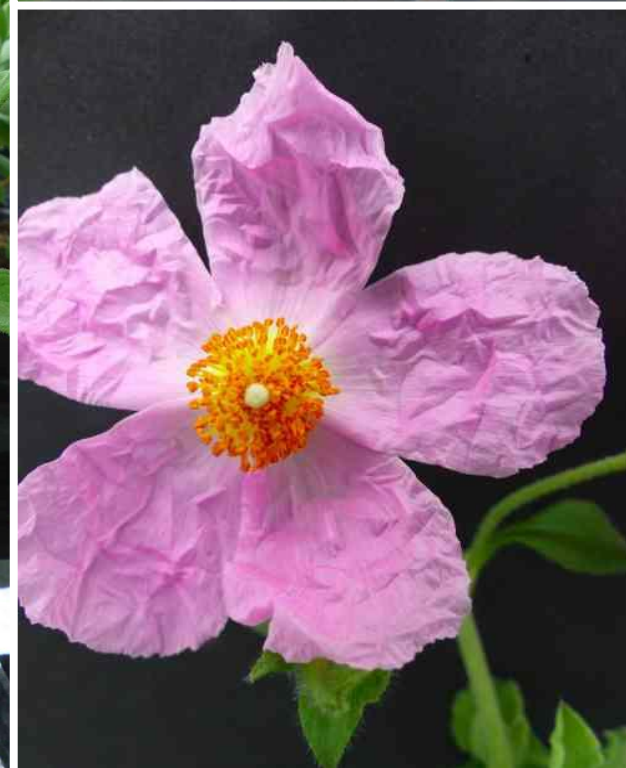

Supplement: s1 [file s1]
